# Supplementary material for: Impact of the change in the antitubercular regimen from three to four drugs on cure and frequency of adverse reactions in tuberculosis patients from Brazil: A retrospective cohort study
Source: PLoS One. 2019 Dec 26;14(12):e0227101. doi: 10.1371/journal.pone.0227101 (PMC6932797; doi:10.1371/journal.pone.0227101)
Supplement: S1 File — (XLSX) [file pone.0227101.s001.xlsx]

## Sheet: arriaga_plosone
gruop_RHZ_RHEZ	Treatment_year	age	cat_age	sex	Pulmonary_tuberculosis	smear_2nd_month	Outcome_treatment	MDR	Diabetes	Hypertension	Tobbacco_use	Alcohol_use	DrogasIlicitas	concomitant_medication	ADR_presentation	number_ADR	ADR1_system_distribuition	ADR2_system_distribuition	ADR3_system_distribuition	ADR4_system_distribuition	ADR5_system_distribuition	ADR6_system_distribuition	treatment_modification1	treatment_modification2	treatment_modification3	treatment_modification4	treatment_modification5	treatment_modification6	Causality_Probable	Causality_Possible	Expected_yes	Expected_nao
RHEZ	2011	25	<30	Female	Extrapulmonary		Cure	No	No	No	No	no	No	no	yes	6	vision	gastrointestinal	Skin	general	general	not apply	Não	Não	Não	Não	Não	not apply	0	5	5	0
RHEZ	2010	26	<30	Male	Pulmonary		Cure	No	No	No	Tobacco	alcohol	No	no	yes	1	gastrointestinal	not apply	not apply	not apply	not apply	not apply	Não	not apply	not apply	not apply	not apply	not apply	0	1	1	0
RHEZ	2014	26	<30	Male	Pulmonary		MDR	MDR	No	No	Tobacco	alcohol	yes	no	yes	1	Skin	not apply	not apply	not apply	not apply	not apply	Não	not apply	not apply	not apply	not apply	not apply	0	1	1	0
RHEZ	2010	25	<30	Male	Pulmonary	Negative	Cure	No	No	No	No	no	No	no	yes	2	gastrointestinal	gastrointestinal	not apply	not apply	not apply	not apply	Sim	Sim	Sim	not apply	not apply	not apply	0	1	1	0
RHEZ	2014	26	<30	Male	Pulmonary	Negative	Cure	No	No	No	No	no	No	no	yes	2	Skin	nervous	not apply	not apply	not apply	not apply	Não	not apply	not apply	not apply	not apply	not apply	0	1	1	0
RHEZ	2010	20	<30	Female	Pulmonary	Negative	Cure	No	No	No	No	no	No	no	yes	2	gastrointestinal	nervous	not apply	not apply	not apply	not apply	Não	not apply	not apply	not apply	not apply	not apply	0	1	1	0
RHEZ	2010	19	<30	Female	Pulmonary	Negative	Cure	No	No	No	No	no	No	no	yes	2	musculoskeletal		gastrointestinal	not apply	not apply	not apply	Não	Não	Não	not apply	not apply	not apply	0	1	1	0
RHEZ	2011	22	<30	Female	Extrapulmonary		Cure	No	No	No	Tobacco	no	No	no	yes	3	gastrointestinal	gastrointestinal	Skin	not apply	not apply	not apply	Não	Não	Não	not apply	not apply	not apply	0	1	1	0
RHEZ	2014	19	<30	Female	Pulmonary		Cure	No	No	No	No	no	No	no	yes	3	gastrointestinal	white cell	nervous	not apply	not apply	not apply	Não	Não	not apply	not apply	not apply	not apply	0	1	1	0
RHEZ	2012	23	<30	Female	Pulmonary	Negative	Cure	No	No	No	No	no	No	no	yes	3	nervous	general	nervous	not apply	not apply	not apply	Não	Não	not apply	not apply	not apply	not apply	0	1	1	0
RHEZ	2013	23	<30	Male	Pulmonary	Negative	Cure	No	No	No	No	no	No	no	yes	3	gastrointestinal	Skin	nervous	not apply	not apply	not apply	Não	Não	not apply	not apply	not apply	not apply	0	1	1	0
RHEZ	2014	26	<30	Male	Pulmonary		MDR	MDR	No	No	Tobacco	no	yes	no	yes	2	heart rate and frequency	not apply	not apply	not apply	not apply	not apply	Não	not apply	not apply	not apply	not apply	not apply	0	1	0	1
RHZ	2009	22	<30	Female	Pulmonary	Negative	Cure	No	No	No	No	alcohol	No	no	yes	1	hepatobiliary	not apply	not apply	not apply	not apply	not apply	Não	not apply	not apply	not apply	not apply	not apply	0	1	1	0
RHZ	2009	20	<30	Female	Pulmonary	Negative	Cure	No	No	No	No	alcohol	yes	no	yes	1	gastrointestinal	not apply	not apply	not apply	not apply	not apply	Não	not apply	not apply	not apply	not apply	not apply	0	1	1	0
RHZ	2009	22	<30	Female	Pulmonary		Cure	No	No	No	No	alcohol	No	no	yes	1	nervous	not apply	not apply	not apply	not apply	not apply	Não	not apply	not apply	not apply	not apply	not apply	0	1	1	0
RHZ	2008	21	<30	Female	Pulmonary	+++	loss follow up	No	No	No	Tobacco	no	No	no	yes	1	nervous	not apply	not apply	not apply	not apply	not apply	Não	not apply	not apply	not apply	not apply	not apply	0	1	1	0
RHZ	2007	29	<30	Female	Extrapulmonary	Negative	Cure	No	No	No	No	no	No	no	yes	1	musculoskeletal	not apply	not apply	not apply	not apply	not apply	Não	not apply	not apply	not apply	not apply	not apply	0	1	1	0
RHZ	2009	21	<30	Female	Pulmonary	Negative	Cure	No	No	No	No	no	No	no	yes	1	gastrointestinal	not apply	not apply	not apply	not apply	not apply	Não	not apply	not apply	not apply	not apply	not apply	0	1	1	0
RHZ	2009	28	<30	Female	Pulmonary	Negative	Cure	No	Diabetes	No	Tobacco	no	No	no	yes	1	gastrointestinal	not apply	not apply	not apply	not apply	not apply	Não	not apply	not apply	not apply	not apply	not apply	0	1	1	0
RHZ	2009	27	<30	Female	Pulmonary	Negative	Cure	No	No	No	No	alcohol	No	no	yes	1	musculoskeletal	not apply	not apply	not apply	not apply	not apply	Não	not apply	not apply	not apply	not apply	not apply	0	1	1	0
RHZ	2008	24	<30	Female	Extrapulmonary	+++	Cure	No	No	No	No	no	No	no	yes	1	Skin	not apply	not apply	not apply	not apply	not apply	Não	not apply	not apply	not apply	not apply	not apply	0	1	1	0
RHZ	2009	20	<30	Male	Pulmonary	Negative	Cure	No	No	No	No	no	No	no	yes	1	gastrointestinal	not apply	not apply	not apply	not apply	not apply	Não	not apply	not apply	not apply	not apply	not apply	0	1	1	0
RHZ	2009	25	<30	Male	Pulmonary	Negative	Cure	No	Diabetes	No	Tobacco	no	No	no	yes	1	gastrointestinal	not apply	not apply	not apply	not apply	not apply	Não	not apply	not apply	not apply	not apply	not apply	0	1	1	0
RHZ	2009	21	<30	Female	Pulmonary	Negative	Cure	No	No	No	Tobacco	alcohol	No	no	yes	1	nervous	not apply	not apply	not apply	not apply	not apply	Não	not apply	not apply	not apply	not apply	not apply	0	1	1	0
RHZ	2008	28	<30	Male	Extrapulmonary		MDR	MDR	No	No	No	no	No	no	yes	1	gastrointestinal	not apply	not apply	not apply	not apply	not apply	Não	not apply	not apply	not apply	not apply	not apply	0	1	1	0
RHZ	2009	25	<30	Male	Pulmonary	Negative	Cure	No	No	No	No	alcohol	No	no	yes	3	nervous	gastrointestinal	nervous	not apply	not apply	not apply	Não	Não	not apply	not apply	not apply	not apply	0	1	1	0
RHZ	2008	26	<30	Male	Pulmonary		loss follow up	No	No	No	Tobacco	alcohol	No	no	yes	3	general	musculoskeletal	nervous	not apply	not apply	not apply	Não	Não	not apply	not apply	not apply	not apply	0	1	1	1
RHZ	2009	20	<30	Male	Pulmonary	Negative	Cure	No	Diabetes	No	Tobacco	no	No	no	yes	4	musculoskeletal	general	musculoskeletal	respiratory	not apply	not apply	Não	Não	Não	Não	not apply	not apply	0	1	1	1
RHZ	2008	22	<30	Female	Extrapulmonary		Cure	No	No	No	No	no	No	no	yes	1	general	not apply	not apply	not apply	not apply	not apply	Não	not apply	not apply	not apply	not apply	not apply	0	1	0	1
RHEZ	2010	53	>=30	Female	Extrapulmonary		Cure	No	No	No	Tobacco	no	No	no	yes	6	nervous	Skin	musculoskeletal	Skin	general	general	Não	Não	Não	Não	Não	Não	0	6	6	0
RHEZ	2010	48	>=30	Female	Pulmonary	Negative	Cure	No	Diabetes	No	No	no	No	no	yes	6	nervous	general	general	respiratory	respiratory	not apply	Não	Não	Não	Não	Não	not apply	0	5	5	0
RHEZ	2010	49	>=30	Female	Pulmonary	Negative	death	No	Diabetes	Hipertensão	No	no	No	no	yes	1	psychiatric	not apply	not apply	not apply	not apply	not apply	Não	not apply	not apply	not apply	not apply	not apply	0	1	1	0
RHEZ	2014	43	>=30	Female	Pulmonary		Cure	No	Diabetes	Hipertensão	Tobacco	no	No	yes	yes	6	psychiatric	musculoskeletal	musculoskeletal	musculoskeletal	musculoskeletal	not apply	Não	Não	Não	Não	Não	not apply	0	5	1	1
RHEZ	2011	55	>=30	Female	Pulmonary	+	Cure	No	Diabetes	No	No	no	No	no	yes	1	nervous	not apply	not apply	not apply	not apply	not apply	Não	not apply	not apply	not apply	not apply	not apply	0	1	1	0
RHEZ	2010	56	>=30	Female	Pulmonary	Negative	Cure	No	No	No	No	no	No	no	yes	1	musculoskeletal	not apply	not apply	not apply	not apply	not apply	Não	not apply	not apply	not apply	not apply	not apply	0	1	1	0
RHEZ	2013	51	>=30	Male	Pulmonary _ Pleural	Negative	loss follow up	No	No	No	Tobacco	no	No	no	yes	1	gastrointestinal	not apply	not apply	not apply	not apply	not apply	Não	not apply	not apply	not apply	not apply	not apply	0	1	1	0
RHEZ	2011	35	>=30	Male	Pulmonary	Negative	Cure	No	No	No	Tobacco	alcohol	No	no	yes	1	Skin	not apply	not apply	not apply	not apply	not apply	Não	not apply	not apply	not apply	not apply	not apply	0	1	1	0
RHEZ	2010	37	>=30	Female	Pulmonary		Cure	No	No	No	Tobacco	no	No	no	yes	1	Skin	not apply	not apply	not apply	not apply	not apply	Não	not apply	not apply	not apply	not apply	not apply	0	1	1	0
RHEZ	2014	34	>=30	Male	Pulmonary	Negative	Cure	No	No	No	No	no	No	no	yes	1	Skin	not apply	not apply	not apply	not apply	not apply	Não	not apply	not apply	not apply	not apply	not apply	0	1	1	0
RHEZ	2011	30	>=30	Female	Pulmonary	Negative	Cure	No	No	No	No	no	No	no	yes	1	gastrointestinal	not apply	not apply	not apply	not apply	not apply	Não	not apply	not apply	not apply	not apply	not apply	0	1	1	0
RHEZ	2011	56	>=30	Male	Pulmonary	Negative	Cure	No	No	No	No	no	No	no	yes	1	gastrointestinal	not apply	not apply	not apply	not apply	not apply	Não	not apply	not apply	not apply	not apply	not apply	0	1	1	0
RHEZ	2010	59	>=30	Male	Pulmonary	Negative	Cure	No	No	No	No	no	No	no	yes	1	nervous	not apply	not apply	not apply	not apply	not apply	Não	not apply	not apply	not apply	not apply	not apply	0	1	1	0
RHEZ	2010	48	>=30	Male	Pulmonary	Negative	Cure	No	Diabetes	No	No	no	No	no	yes	1	Skin	not apply	not apply	not apply	not apply	not apply	Não	not apply	not apply	not apply	not apply	not apply	0	1	1	0
RHEZ	2012	30	>=30	Female	Pulmonary		loss follow up	No	No	No	No	no	No	no	yes	1	Skin	not apply	not apply	not apply	not apply	not apply	Não	not apply	not apply	not apply	not apply	not apply	0	1	1	0
RHEZ	2010	58	>=30	Male	Pulmonary	Negative	Cure	No	No	No	Tobacco	alcohol	No	no	yes	1	Skin	not apply	not apply	not apply	not apply	not apply	Não	not apply	not apply	not apply	not apply	not apply	0	1	1	0
RHEZ	2012	45	>=30	Male	Pulmonary	Negative	Cure	No	No	No	Tobacco	no	No	no	yes	1	Skin	not apply	not apply	not apply	not apply	not apply	Não	not apply	not apply	not apply	not apply	not apply	0	1	1	0
RHEZ	2014	31	>=30	Male	Pulmonary		Cure	No	No	No	No	no	No	no	yes	1	Skin	not apply	not apply	not apply	not apply	not apply	Não	not apply	not apply	not apply	not apply	not apply	0	1	1	0
RHEZ	2014	54	>=30	Female	Pulmonary		Cure	No	No	No	No	no	No	no	yes	1	gastrointestinal	not apply	not apply	not apply	not apply	not apply	Não	not apply	not apply	not apply	not apply	not apply	0	1	1	0
RHEZ	2012	39	>=30	Female	Pulmonary		Cure	No	No	No	No	no	No	no	yes	1	psychiatric	not apply	not apply	not apply	not apply	not apply	Não	not apply	not apply	not apply	not apply	not apply	0	1	1	0
RHEZ	2012	31	>=30	Male	Pulmonary		Cure	No	Diabetes	No	Tobacco	alcohol	No	no	yes	1	Skin	not apply	not apply	not apply	not apply	not apply	Não	not apply	not apply	not apply	not apply	not apply	0	1	1	0
RHEZ	2011	51	>=30	Male	Pulmonary	Negative	Cure	No	Diabetes	No	No	alcohol	No	no	yes	1	gastrointestinal	not apply	not apply	not apply	not apply	not apply	Não	not apply	not apply	not apply	not apply	not apply	0	1	1	0
RHEZ	2014	53	>=30	Male	Pulmonary	Negative	Cure	No	Diabetes	No	No	no	No	no	yes	1	Skin	not apply	not apply	not apply	not apply	not apply	Não	not apply	not apply	not apply	not apply	not apply	0	1	1	0
RHEZ	2013	37	>=30	Male	Pulmonary		loss follow up	No	No	No	No	alcohol	No	no	yes	1	nervous	not apply	not apply	not apply	not apply	not apply	Não	not apply	not apply	not apply	not apply	not apply	0	1	1	0
RHEZ	2014	51	>=30	Female	Extrapulmonary		Cure	No	No	No	No	no	No	yes	yes	1	nervous	not apply	not apply	not apply	not apply	not apply	Não	not apply	not apply	not apply	not apply	not apply	0	1	1	0
RHEZ	2013	49	>=30	Male	Pulmonary		loss follow up	No	No	No	No	no	No	no	yes	1	Skin	not apply	not apply	not apply	not apply	not apply	Não	not apply	not apply	not apply	not apply	not apply	0	1	1	0
RHEZ	2014	40	>=30	Female	Extrapulmonary		Cure	No	No	No	No	no	No	no	yes	1	gastrointestinal	not apply	not apply	not apply	not apply	not apply	Não	not apply	not apply	not apply	not apply	not apply	0	1	1	0
RHEZ	2012	53	>=30	Male	Pulmonary	Negative	Cure	No	No	No	No	no	yes	no	yes	1	Skin	not apply	not apply	not apply	not apply	not apply	Não	not apply	not apply	not apply	not apply	not apply	0	1	1	0
RHEZ	2012	36	>=30	Male	Pulmonary		Cure	No	No	No	No	no	No	no	yes	1	gastrointestinal	not apply	not apply	not apply	not apply	not apply	Não	not apply	not apply	not apply	not apply	not apply	0	1	1	0
RHEZ	2010	54	>=30	Male	Pulmonary	Negative	Cure	No	No	No	No	alcohol	No	no	yes	1	Skin	not apply	not apply	not apply	not apply	not apply	Não	not apply	not apply	not apply	not apply	not apply	0	1	1	0
RHEZ	2011	62	>=30	Female	Pulmonary	Negative	Cure	No	No	No	No	alcohol	No	no	yes	1	Skin	not apply	not apply	not apply	not apply	not apply	Não	not apply	not apply	not apply	not apply	not apply	0	1	1	0
RHEZ	2014	50	>=30	Female	Pulmonary	Negative	Cure	No	No	No	No	no	No	no	yes	1	nervous	not apply	not apply	not apply	not apply	not apply	Não	not apply	not apply	not apply	not apply	not apply	0	1	1	0
RHEZ	2011	56	>=30	Male	Pulmonary	Negative	Cure	No	Diabetes	No	No	no	No	no	yes	1	Skin	not apply	not apply	not apply	not apply	not apply	Não	not apply	not apply	not apply	not apply	not apply	0	1	1	0
RHEZ	2012	54	>=30	Female	Pulmonary		Cure	No	No	No	No	no	No	no	yes	1	Skin	not apply	not apply	not apply	not apply	not apply	Não	not apply	not apply	not apply	not apply	not apply	0	1	1	0
RHEZ	2012	44	>=30	Female	Pulmonary		Cure	No	No	No	No	no	No	no	yes	1	Skin	not apply	not apply	not apply	not apply	not apply	Não	not apply	not apply	not apply	not apply	not apply	0	1	1	0
RHEZ	2013	42	>=30	Female	Pulmonary	Negative	Cure	No	No	No	No	no	No	no	yes	1	gastrointestinal	not apply	not apply	not apply	not apply	not apply	Não	not apply	not apply	not apply	not apply	not apply	0	1	1	0
RHEZ	2014	56	>=30	Male	Pulmonary		Cure	No	No	No	Tobacco	alcohol	No	no	yes	1	psychiatric	not apply	not apply	not apply	not apply	not apply	Não	not apply	not apply	not apply	not apply	not apply	0	1	1	0
RHEZ	2012	31	>=30	Male	Pulmonary	Negative	Cure	No	No	No	No	no	No	no	yes	1	gastrointestinal	not apply	not apply	not apply	not apply	not apply	Não	not apply	not apply	not apply	not apply	not apply	0	1	1	0
RHEZ	2011	54	>=30	Male	Pulmonary	Negative	Cure	No	No	No	Tobacco	alcohol	No	no	yes	1	musculoskeletal	not apply	not apply	not apply	not apply	not apply	Não	not apply	not apply	not apply	not apply	not apply	0	1	1	0
RHEZ	2010	53	>=30	Female	Extrapulmonary		Cure	No	No	No	No	no	No	no	yes	1	Skin	not apply	not apply	not apply	not apply	not apply	Não	not apply	not apply	not apply	not apply	not apply	0	1	1	0
RHEZ	2012	47	>=30	Female	Pulmonary		MDR	MDR	Diabetes	No	No	no	No	no	yes	2	gastrointestinal	gastrointestinal	not apply	not apply	not apply	not apply	Não	Não	not apply	not apply	not apply	not apply	0	1	1	0
RHEZ	2011	37	>=30	Male	Pulmonary	Negative	Cure	No	No	No	No	alcohol	No	no	yes	2	general	general	not apply	not apply	not apply	not apply	Não	Não	not apply	not apply	not apply	not apply	0	1	1	0
RHEZ	2011	49	>=30	Male	Pulmonary	Negative	Cure	No	No	No	No	no	No	no	yes	2	nervous	gastrointestinal	not apply	not apply	not apply	not apply	Não	Não	Não	not apply	not apply	not apply	0	1	1	0
RHEZ	2011	43	>=30	Male	Pulmonary		Cure	No	No	No	Tobacco	no	No	no	yes	2	nervous	gastrointestinal	not apply	not apply	not apply	not apply	Não	Não	not apply	not apply	not apply	not apply	0	1	1	0
RHEZ	2014	36	>=30	Female	Pulmonary	Negative	Cure	No	No	No	No	no	No	no	yes	2	musculoskeletal	musculoskeletal	not apply	not apply	not apply	not apply	Não	Não	Não	Não	not apply	not apply	0	1	1	0
RHEZ	2012	60	>=30	Female	Pulmonary		Cure	No	No	No	No	no	No	no	yes	2	Skin	musculoskeletal	not apply	not apply	not apply	not apply	Não	not apply	not apply	not apply	not apply	not apply	0	1	1	0
RHEZ	2010	47	>=30	Female	Extrapulmonary	Negative	Cure	No	No	No	Tobacco	no	No	no	yes	2	nervous	gastrointestinal	not apply	not apply	not apply	not apply	Não	Não	Não	not apply	not apply	not apply	0	1	1	0
RHEZ	2013	46	>=30	Male	Pulmonary	Negative	Cure	No	Diabetes	No	No	no	No	no	yes	2	nervous	respiratory	not apply	not apply	not apply	not apply	Não	Não	not apply	not apply	not apply	not apply	0	1	1	0
RHEZ	2013	48	>=30	Female	Pulmonary	Negative	Cure	No	No	No	No	alcohol	No	no	yes	2	gastrointestinal	respiratory	not apply	not apply	not apply	not apply	Não	Não	not apply	not apply	not apply	not apply	0	1	1	0
RHEZ	2011	42	>=30	Male	Pulmonary	Negative	Cure	No	No	No	Tobacco	alcohol	No	no	yes	2	nervous	respiratory	not apply	not apply	not apply	not apply	Não	Não	Não	Não	not apply	not apply	0	1	1	0
RHEZ	2012	31	>=30	Female	Pulmonary	Negative	Cure	No	No	No	No	alcohol	No	no	yes	2	psychiatric	Skin	not apply	not apply	not apply	not apply	Não	Não	not apply	not apply	not apply	not apply	0	1	1	0
RHEZ	2013	41	>=30	Female	Pulmonary	Negative	Cure	No	No	No	Tobacco	no	No	no	yes	2	Skin	Skin	not apply	not apply	not apply	not apply	Sim	Não	not apply	not apply	not apply	not apply	0	1	1	0
RHEZ	2013	46	>=30	Female	Pulmonary	Negative	Cure	No	No	No	Tobacco	no	No	no	yes	2	gastrointestinal	Skin	not apply	not apply	not apply	not apply	Não	Não	not apply	not apply	not apply	not apply	0	1	1	0
RHEZ	2011	61	>=30	Female	Pulmonary		death	No	No	No	No	no	No	no	yes	2	gastrointestinal	nervous	not apply	not apply	not apply	not apply	Não	not apply	not apply	not apply	not apply	not apply	0	1	1	0
RHEZ	2012	32	>=30	Female	Pulmonary		Cure	No	No	No	No	no	No	no	yes	3	gastrointestinal	gastrointestinal	respiratory	not apply	not apply	not apply	Não	Não	Não	not apply	not apply	not apply	0	1	1	0
RHEZ	2013	33	>=30	Male	Extrapulmonary		Cure	No	No	No	No	no	No	no	yes	3	musculoskeletal	Skin	not apply	not apply	not apply	not apply	Não	Não	not apply	not apply	not apply	not apply	0	1	1	0
RHEZ	2012	33	>=30	Female	Pulmonary		Cure	No	No	No	No	no	No	no	yes	3	gastrointestinal	Skin	Skin	not apply	not apply	not apply	Não	Não	Sim	not apply	not apply	not apply	0	1	1	0
RHEZ	2012	60	>=30	Male	Pulmonary	Negative	Cure	No	Diabetes	No	No	no	No	no	yes	3	general	musculoskeletal	not apply	not apply	not apply	not apply	Não	Não	not apply	not apply	not apply	not apply	0	1	1	0
RHEZ	2013	47	>=30	Male	Extrapulmonary		loss follow up	No	No	No	No	no	No	no	yes	3	hepatobiliary	musculoskeletal	gastrointestinal	not apply	not apply	not apply	Não	Não	Não	not apply	not apply	not apply	0	1	1	0
RHEZ	2011	38	>=30	Female	Pulmonary	Negative	Cure	No	No	No	Tobacco	no	No	no	yes	3	gastrointestinal	gastrointestinal	nervous	not apply	not apply	not apply	Não	Não	not apply	not apply	not apply	not apply	0	1	1	0
RHEZ	2014	54	>=30	Female	Pulmonary	Negative	Cure	No	No	No	No	no	No	no	yes	3	nervous	gastrointestinal	nervous	not apply	not apply	not apply	Não	Não	not apply	not apply	not apply	not apply	0	1	1	0
RHEZ	2014	49	>=30	Female	Pulmonary		Cure	No	No	No	No	no	No	no	yes	3	gastrointestinal	gastrointestinal	nervous	not apply	not apply	not apply	Não	Não	not apply	not apply	not apply	not apply	0	1	1	0
RHEZ	2011	59	>=30	Male	Pulmonary	Negative	Cure	No	No	No	Tobacco	no	No	no	yes	3	musculoskeletal	general	gastrointestinal	not apply	not apply	not apply	Não	Não	Não	Não	not apply	not apply	0	1	1	0
RHEZ	2014	35	>=30	Female	Pulmonary	Negative	Cure	No	No	No	No	no	No	no	yes	3	gastrointestinal	respiratory	gastrointestinal	not apply	not apply	not apply	Não	Não	Não	not apply	not apply	not apply	0	1	1	0
RHEZ	2010	44	>=30	Male	Pulmonary	Negative	Cure	No	Diabetes	No	No	no	No	no	yes	3	Skin	respiratory	nervous	not apply	not apply	not apply	Não	Não	not apply	Não	not apply	not apply	0	1	1	0
RHEZ	2010	48	>=30	Female	Pulmonary		loss follow up	No	No	No	Tobacco	no	No	no	yes	3	gastrointestinal	gastrointestinal	nervous	not apply	not apply	not apply	Não	Não	not apply	not apply	not apply	not apply	0	1	1	0
RHEZ	2011	37	>=30	Female	Pulmonary	Negative	Cure	No	No	No	No	no	No	no	yes	3	musculoskeletal	Skin	nervous	not apply	not apply	not apply	Não	Não	not apply	not apply	not apply	not apply	0	1	1	1
RHEZ	2010	55	>=30	Female	Pulmonary	Negative	Cure	No	No	No	Tobacco	no	No	no	yes	3	Skin	respiratory	nervous	not apply	not apply	not apply	Não	Não	not apply	not apply	not apply	not apply	0	1	1	0
RHEZ	2012	55	>=30	Female	Pulmonary	Negative	Cure	No	No	No	No	no	No	no	yes	3	nervous	general	nervous	not apply	not apply	not apply	Não	Não	Não	Não	not apply	not apply	0	1	1	0
RHEZ	2014	39	>=30	Female	Pulmonary		Cure	No	No	No	No	no	No	no	yes	3	Skin	gastrointestinal	nervous	not apply	not apply	not apply	Não	Não	not apply	not apply	not apply	not apply	0	1	1	0
RHEZ	2013	54	>=30	Male	Pulmonary	+	Cure	No	No	No	Tobacco	no	No	yes	yes	3	gastrointestinal	gastrointestinal	nervous	not apply	not apply	not apply	Não	Não	not apply	not apply	not apply	not apply	0	1	1	0
RHZ	2007	61	>=30	Male	Pulmonary		Cure	No	No	No	Tobacco	no	No	no	yes	6	nervous	gastrointestinal	gastrointestinal	respiratory	general	not apply	Não	Não	Não	Não	Não	not apply	0	5	5	0
RHZ	2009	33	>=30	Female	Pulmonary	Negative	Cure	No	No	No	No	alcohol	No	no	yes	1	gastrointestinal	not apply	not apply	not apply	not apply	not apply	Não	not apply	not apply	not apply	not apply	not apply	0	1	1	0
RHZ	2009	36	>=30	Female	Pulmonary	Negative	Cure	No	No	No	No	no	No	no	yes	1	Skin	not apply	not apply	not apply	not apply	not apply	Não	not apply	not apply	not apply	not apply	not apply	0	1	1	0
RHZ	2009	33	>=30	Male	Pulmonary	Negative	Cure	No	No	No	Tobacco	alcohol	No	no	yes	1	Skin	not apply	not apply	not apply	not apply	not apply	Não	not apply	not apply	not apply	not apply	not apply	0	1	1	0
RHZ	2009	33	>=30	Female	Pulmonary	Negative	Cure	No	No	No	No	alcohol	No	no	yes	1	nervous	not apply	not apply	not apply	not apply	not apply	Não	not apply	not apply	not apply	not apply	not apply	0	1	1	0
RHZ	2008	43	>=30	Male	Pulmonary	Negative	Cure	No	No	No	No	no	No	no	yes	1	gastrointestinal	not apply	not apply	not apply	not apply	not apply	Não	not apply	not apply	not apply	not apply	not apply	0	1	1	0
RHZ	2008	51	>=30	Male	Pulmonary	Negative	Cure	No	No	No	Tobacco	no	No	no	yes	1	nervous	not apply	not apply	not apply	not apply	not apply	Não	not apply	not apply	not apply	not apply	not apply	0	1	1	0
RHZ	2008	47	>=30	Female	Pulmonary	Negative	Cure	No	No	No	No	no	No	no	yes	1	nervous	not apply	not apply	not apply	not apply	not apply	Não	not apply	not apply	not apply	not apply	not apply	0	1	1	0
RHZ	2008	36	>=30	Female	Pulmonary		Cure	No	No	No	No	no	No	no	yes	1	Skin	not apply	not apply	not apply	not apply	not apply	Não	not apply	not apply	not apply	not apply	not apply	0	1	1	0
RHZ	2008	31	>=30	Female	Pulmonary	Negative	Cure	No	No	No	No	no	No	no	yes	1	Skin	not apply	not apply	not apply	not apply	not apply	Não	not apply	not apply	not apply	not apply	not apply	0	1	1	0
RHZ	2009	63	>=30	Female	Pulmonary		Cure	No	No	No	Tobacco	no	No	no	yes	1	gastrointestinal	not apply	not apply	not apply	not apply	not apply	Não	not apply	not apply	not apply	not apply	not apply	0	1	1	0
RHZ	2008	48	>=30	Male	Pulmonary	+	loss follow up	No	No	No	No	no	No	no	yes	1	nervous	not apply	not apply	not apply	not apply	not apply	Não	not apply	not apply	not apply	not apply	not apply	0	1	1	0
RHZ	2008	34	>=30	Male	Pulmonary	Negative	Cure	No	No	No	No	no	No	no	yes	1	psychiatric	not apply	not apply	not apply	not apply	not apply	Não	not apply	not apply	not apply	not apply	not apply	0	1	1	0
RHZ	2009	38	>=30	Female	Pulmonary		death	No	No	No	Tobacco	alcohol	No	no	yes	1	Skin	not apply	not apply	not apply	not apply	not apply	Não	not apply	not apply	not apply	not apply	not apply	0	1	1	0
RHZ	2007	31	>=30	Male	Pulmonary	Negative	Cure	No	No	No	Tobacco	alcohol	No	no	yes	1	Skin	not apply	not apply	not apply	not apply	not apply	Não	not apply	not apply	not apply	not apply	not apply	0	1	1	0
RHZ	2009	49	>=30	Female	Pulmonary	Negative	Cure	No	No	No	Tobacco	no	No	no	yes	1	musculoskeletal	not apply	not apply	not apply	not apply	not apply	Não	not apply	not apply	not apply	not apply	not apply	0	1	1	0
RHZ	2009	40	>=30	Male	Pulmonary	Negative	Cure	No	No	No	No	no	No	no	yes	1	gastrointestinal	not apply	not apply	not apply	not apply	not apply	Não	not apply	not apply	not apply	not apply	not apply	0	1	1	0
RHZ	2007	36	>=30	Female	Pulmonary	Negative	Cure	No	No	No	No	no	No	no	yes	1	gastrointestinal	not apply	not apply	not apply	not apply	not apply	Não	not apply	not apply	not apply	not apply	not apply	0	1	1	0
RHZ	2009	52	>=30	Male	Pulmonary		Cure	No	No	No	Tobacco	no	No	yes	yes	3	general	respiratory	nervous	not apply	not apply	not apply	Não	Não	not apply	not apply	not apply	not apply	0	1	1	1
RHZ	2008	45	>=30	Male	Pulmonary	Negative	Cure	No	No	No	No	alcohol	No	no	yes	3	gastrointestinal	gastrointestinal	nervous	not apply	not apply	not apply	Não	Não	not apply	not apply	not apply	not apply	0	1	1	0
RHZ	2007	39	>=30	Female	Pulmonary	Negative	Cure	No	No	No	Tobacco	no	No	no	yes	3	Skin	respiratory	nervous	not apply	not apply	not apply	Não	Não	not apply	not apply	not apply	not apply	0	1	1	0
RHZ	2008	47	>=30	Female	Pulmonary	Negative	Cure	No	No	No	No	no	No	no	yes	3	nervous	gastrointestinal	nervous	not apply	not apply	not apply	Não	Não	not apply	not apply	not apply	not apply	0	1	1	0
RHZ	2009	44	>=30	Female	Pulmonary		Cure	No	No	No	No	alcohol	No	no	yes	3	gastrointestinal	gastrointestinal	musculoskeletal	not apply	not apply	not apply	Não	Não	Não	not apply	not apply	not apply	0	1	1	0
RHZ	2008	35	>=30	Female	Pulmonary	Negative	Cure	No	No	No	No	no	No	no	yes	3	gastrointestinal	gastrointestinal	nervous	not apply	not apply	not apply	Não	Não	not apply	not apply	not apply	not apply	0	1	1	0
RHZ	2009	38	>=30	Male	Pulmonary		Cure	No	No	No	Tobacco	alcohol	No	no	yes	4	general	general	general	general	not apply	not apply	Não	Não	Não	Não	not apply	not apply	0	1	1	0
RHZ	2009	57	>=30	Male	Pulmonary	Negative	Cure	No	Diabetes	Hipertensão	No	no	No	yes	yes	1	general	not apply	not apply	not apply	not apply	not apply	Não	not apply	not apply	not apply	not apply	not apply	0	1	0	1
RHZ	2009	33	>=30	Female	Pulmonary	Negative	Cure	No	No	No	Tobacco	no	No	no	yes	1	psychiatric	not apply	not apply	not apply	not apply	not apply	Não	not apply	not apply	not apply	not apply	not apply	0	1	0	1
RHZ	2009	29	<30	Female	Pulmonary	Negative	Cure	No	No	No	No	no	No	no	yes	6	gastrointestinal	respiratory	psychiatric	gastrointestinal	gastrointestinal	gastrointestinal	Não	Não	Não	Não	Não	Não	1	5	6	0
RHZ	2008	28	<30	Male	Pulmonary		Cure	No	No	No	No	no	No	no	yes	6	gastrointestinal	gastrointestinal	gastrointestinal	Skin	Skin	gastrointestinal	Não	Não	Não	Não	Não	Não	1	5	5	1
RHEZ	2011	35	>=30	Female	Pulmonary	Negative	Cure	No	No	No	No	no	No	no	yes	1	hepatobiliary	not apply	not apply	not apply	not apply	not apply	Não	not apply	not apply	not apply	not apply	not apply	1	0	1	0
RHEZ	2012	62	>=30	Male	Pulmonary	Negative	Cure	No	Diabetes	No	Tobacco	no	No	no	yes	2	nervous	nervous	not apply	not apply	not apply	not apply	Não	not apply	not apply	not apply	not apply	not apply	1	0	1	0
RHEZ	2014	32	>=30	Female	Pulmonary	Negative	Cure	No	No	No	No	no	No	no	yes	3	Skin	Skin	nervous	not apply	not apply	not apply	Sim	Não	not apply	not apply	not apply	not apply	1	0	1	1
RHZ	2009	46	>=30	Male	Pulmonary		loss follow up	No	No	No	No	alcohol	No	yes	yes	1	gastrointestinal	not apply	not apply	not apply	not apply	not apply	Não	not apply	not apply	not apply	not apply	not apply	1	0	1	0
RHZ	2008	50	>=30	Male	Pulmonary		Cure	No	No	No	No	no	No	no	yes	1	Skin	not apply	not apply	not apply	not apply	not apply	Não	not apply	not apply	not apply	not apply	not apply	1	0	1	0
RHZ	2008	39	>=30	Female	Extrapulmonary		Cure	No	No	No	No	no	No	no	yes	1	hepatobiliary	not apply	not apply	not apply	not apply	not apply	Não	not apply	not apply	not apply	not apply	not apply	1	0	1	0
RHZ	2009	40	>=30	Female	Pulmonary	Negative	Cure	No	No	No	No	alcohol	No	no	yes	1	hepatobiliary	not apply	not apply	not apply	not apply	not apply	Não	not apply	not apply	not apply	not apply	not apply	1	0	1	0
RHZ	2009	32	>=30	Male	Pulmonary	Negative	Cure	No	No	No	No	alcohol	No	no	yes	3	psychiatric	musculoskeletal	nervous	not apply	not apply	not apply	Não	Não	not apply	not apply	not apply	not apply	1	1	1	0
RHZ	2008	30	>=30	Female	Pulmonary	Negative	death	No	No	No	No	no	No	no	yes	3	vision	respiratory	nervous	not apply	not apply	not apply	Não	Não	not apply	not apply	not apply	not apply	1	0	1	0
RHZ	2009	33	>=30	Male	Pulmonary		death	No	No	No	Tobacco	no	No	no	yes	4	Skin	psychiatric	gastrointestinal	general	not apply	not apply	Não	Não	Não	not apply	not apply	not apply	1	1	1	0
RHZ	2007	30	>=30	Female	Pulmonary		Cure	No	No	No	No	no	No	no	yes	4	gastrointestinal	gastrointestinal	Skin	general	not apply	not apply	Não	Não	Não	not apply	not apply	not apply	1	1	1	0
RHZ	2009	36	>=30	Female	Pulmonary	Negative	Cure	No	No	No	Tobacco	no	No	no	yes	6	musculoskeletal	general	musculoskeletal	red cells	red cells	not apply	Não	Não	Não	Não	Não	not apply	1	1	1	1
RHEZ	2013	20	<30	Female	Pulmonary		Cure	No	No	No	No	no	No	no	no	0	not apply	not apply	not apply	not apply	not apply	not apply	not apply	not apply	not apply	not apply	not apply	not apply
RHEZ	2014	24	<30	Female	Pulmonary		Cure	No	No	No	No	no	No	no	no	0	not apply	not apply	not apply	not apply	not apply	not apply	not apply	not apply	not apply	not apply	not apply	not apply
RHEZ	2012	24	<30	Male	Pulmonary	Negative	Cure	No	No	No	No	no	No	no	no	0	not apply	not apply	not apply	not apply	not apply	not apply	not apply	not apply	not apply	not apply	not apply	not apply
RHEZ	2010	28	<30	Male	Pulmonary		Cure	No	No	No	No	no	No	no	no	0	not apply	not apply	not apply	not apply	not apply	not apply	not apply	not apply	not apply	not apply	not apply	not apply
RHEZ	2013	28	<30	Male	Pulmonary	Negative	Cure	No	No	No	No	alcohol	No	no	no	0	not apply	not apply	not apply	not apply	not apply	not apply	not apply	not apply	not apply	not apply	not apply	not apply
RHEZ	2014	20	<30	Female	Pulmonary	Negative	Cure	No	No	No	No	no	No	no	no	0	not apply	not apply	not apply	not apply	not apply	not apply	not apply	not apply	not apply	not apply	not apply	not apply
RHEZ	2011	28	<30	Male	Pulmonary		Cure	No	No	No	No	alcohol	No	no	no	0	not apply	not apply	not apply	not apply	not apply	not apply	not apply	not apply	not apply	not apply	not apply	not apply
RHEZ	2012	24	<30	Male	Extrapulmonary		Cure	No	No	No	No	no	No	no	no	0	not apply	not apply	not apply	not apply	not apply	not apply	not apply	not apply	not apply	not apply	not apply	not apply
RHEZ	2011	21	<30	Female	Pulmonary		Cure	No	No	No	Tobacco	no	No	no	no	0	not apply	not apply	not apply	not apply	not apply	not apply	not apply	not apply	not apply	not apply	not apply	not apply
RHEZ	2014	27	<30	Male	Pulmonary	Negative	Cure	No	No	No	No	no	No	no	no	0	not apply	not apply	not apply	not apply	not apply	not apply	not apply	not apply	not apply	not apply	not apply	not apply
RHEZ	2014	20	<30	Male	Pulmonary	Negative	Cure	No	No	No	No	no	No	no	no	0	not apply	not apply	not apply	not apply	not apply	not apply	not apply	not apply	not apply	not apply	not apply	not apply
RHEZ	2011	27	<30	Male	Pulmonary		death	No	No	No	No	alcohol	No	no	no	0	not apply	not apply	not apply	not apply	not apply	not apply	not apply	not apply	not apply	not apply	not apply	not apply
RHEZ	2011	27	<30	Male	Pulmonary		Cure	No	No	No	Tobacco	no	No	no	no	0	not apply	not apply	not apply	not apply	not apply	not apply	not apply	not apply	not apply	not apply	not apply	not apply
RHEZ	2011	22	<30	Male	Pulmonary		loss follow up	No	No	No	Tobacco	alcohol	No	no	no	0	not apply	not apply	not apply	not apply	not apply	not apply	not apply	not apply	not apply	not apply	not apply	not apply
RHEZ	2013	25	<30	Male	Extrapulmonary	Negative	Cure	No	No	No	No	alcohol	No	no	no	0	not apply	not apply	not apply	not apply	not apply	not apply	not apply	not apply	not apply	not apply	not apply	not apply
RHEZ	2011	29	<30	Male	Pulmonary		death	No	No	No	Tobacco	no	No	no	no	0	not apply	not apply	not apply	not apply	not apply	not apply	not apply	not apply	not apply	not apply	not apply	not apply
RHEZ	2014	28	<30	Male	Pulmonary		MDR	MDR	No	No	Tobacco	no	yes	no	no	0	not apply	not apply	not apply	not apply	not apply	not apply	not apply	not apply	not apply	not apply	not apply	not apply
RHEZ	2012	26	<30	Female	Extrapulmonary		loss follow up	No	No	No	No	no	No	no	no	0	not apply	not apply	not apply	not apply	not apply	not apply	not apply	not apply	not apply	not apply	not apply	not apply
RHEZ	2013	28	<30	Male	Pulmonary	Negative	Cure	No	No	No	No	no	No	no	no	0	not apply	not apply	not apply	not apply	not apply	not apply	not apply	not apply	not apply	not apply	not apply	not apply
RHEZ	2012	24	<30	Female	Pulmonary	Negative	Cure	No	No	No	No	no	No	no	no	0	not apply	not apply	not apply	not apply	not apply	not apply	not apply	not apply	not apply	not apply	not apply	not apply
RHEZ	2010	27	<30	Female	Pulmonary	Negative	Cure	No	No	No	No	alcohol	No	no	no	0	not apply	not apply	not apply	not apply	not apply	not apply	not apply	not apply	not apply	not apply	not apply	not apply
RHEZ	2010	24	<30	Male	Pulmonary	Negative	Cure	No	No	No	No	no	No	no	no	0	not apply	not apply	not apply	not apply	not apply	not apply	not apply	not apply	not apply	not apply	not apply	not apply
RHEZ	2010	28	<30	Female	Pulmonary	Negative	Cure	No	No	No	No	no	No	no	no	0	not apply	not apply	not apply	not apply	not apply	not apply	not apply	not apply	not apply	not apply	not apply	not apply
RHEZ	2014	28	<30	Female	Extrapulmonary		Cure	No	No	No	No	no	No	no	no	0	not apply	not apply	not apply	not apply	not apply	not apply	not apply	not apply	not apply	not apply	not apply	not apply
RHEZ	2011	26	<30	Female	Pulmonary	Negative	Cure	No	No	No	Tobacco	no	No	no	no	0	not apply	not apply	not apply	not apply	not apply	not apply	not apply	not apply	not apply	not apply	not apply	not apply
RHEZ	2013	25	<30	Female	Pulmonary		Cure	No	No	No	No	no	No	no	no	0	not apply	not apply	not apply	not apply	not apply	not apply	not apply	not apply	not apply	not apply	not apply	not apply
RHEZ	2012	29	<30	Male	Pulmonary		loss follow up	No	No	No	Tobacco	no	No	no	no	0	not apply	not apply	not apply	not apply	not apply	not apply	not apply	not apply	not apply	not apply	not apply	not apply
RHEZ	2011	27	<30	Male	Pulmonary	Negative	Cure	No	No	No	Tobacco	alcohol	No	no	no	0	not apply	not apply	not apply	not apply	not apply	not apply	not apply	not apply	not apply	not apply	not apply	not apply
RHEZ	2014	19	<30	Male	Pulmonary	Negative	Cure	No	No	No	No	no	No	no	no	0	not apply	not apply	not apply	not apply	not apply	not apply	not apply	not apply	not apply	not apply	not apply	not apply
RHEZ	2013	19	<30	Female	Pulmonary	Negative	Cure	No	No	No	No	no	No	no	no	0	not apply	not apply	not apply	not apply	not apply	not apply	not apply	not apply	not apply	not apply	not apply	not apply
RHEZ	2010	29	<30	Female	Extrapulmonary		Cure	No	No	No	No	no	No	no	no	0	not apply	not apply	not apply	not apply	not apply	not apply	not apply	not apply	not apply	not apply	not apply	not apply
RHEZ	2012	19	<30	Male	Pulmonary	Negative	Cure	No	No	No	No	no	No	no	no	0	not apply	not apply	not apply	not apply	not apply	not apply	not apply	not apply	not apply	not apply	not apply	not apply
RHEZ	2014	23	<30	Female	Pulmonary	Negative	Cure	No	No	No	No	no	No	no	no	0	not apply	not apply	not apply	not apply	not apply	not apply	not apply	not apply	not apply	not apply	not apply	not apply
RHEZ	2010	26	<30	Female	Pulmonary	Negative	Cure	No	No	No	No	no	No	no	no	0	not apply	not apply	not apply	not apply	not apply	not apply	not apply	not apply	not apply	not apply	not apply	not apply
RHEZ	2014	20	<30	Male	Pulmonary		Cure	No	No	No	Tobacco	no	No	no	no	0	not apply	not apply	not apply	not apply	not apply	not apply	not apply	not apply	not apply	not apply	not apply	not apply
RHEZ	2014	18	<30	Female	Pulmonary	+++	Cure	No	No	No	No	no	No	no	no	0	not apply	not apply	not apply	not apply	not apply	not apply	not apply	not apply	not apply	not apply	not apply	not apply
RHEZ	2013	22	<30	Male	Pulmonary	Negative	Cure	No	No	No	Tobacco	alcohol	No	no	no	0	not apply	not apply	not apply	not apply	not apply	not apply	not apply	not apply	not apply	not apply	not apply	not apply
RHEZ	2014	23	<30	Female	Pulmonary	Negative	loss follow up	No	No	No	No	no	No	no	no	0	not apply	not apply	not apply	not apply	not apply	not apply	not apply	not apply	not apply	not apply	not apply	not apply
RHEZ	2011	24	<30	Female	Pulmonary	Negative	Cure	No	No	No	Tobacco	no	No	no	no	0	not apply	not apply	not apply	not apply	not apply	not apply	not apply	not apply	not apply	not apply	not apply	not apply
RHEZ	2011	27	<30	Male	Pulmonary	Negative	Cure	No	No	No	No	no	No	no	no	0	not apply	not apply	not apply	not apply	not apply	not apply	not apply	not apply	not apply	not apply	not apply	not apply
RHEZ	2011	23	<30	Male	Pulmonary		Cure	No	No	No	No	no	No	no	no	0	not apply	not apply	not apply	not apply	not apply	not apply	not apply	not apply	not apply	not apply	not apply	not apply
RHEZ	2013	26	<30	Male	Pulmonary		Cure	No	No	No	No	no	No	no	no	0	not apply	not apply	not apply	not apply	not apply	not apply	not apply	not apply	not apply	not apply	not apply	not apply
RHEZ	2014	25	<30	Male	Extrapulmonary		Cure	No	No	No	No	no	No	no	no	0	not apply	not apply	not apply	not apply	not apply	not apply	not apply	not apply	not apply	not apply	not apply	not apply
RHEZ	2012	20	<30	Male	Pulmonary	Negative	Cure	No	No	No	No	no	No	no	no	0	not apply	not apply	not apply	not apply	not apply	not apply	not apply	not apply	not apply	not apply	not apply	not apply
RHEZ	2014	28	<30	Female	Pulmonary		Cure	No	No	No	No	no	No	no	no	0	not apply	not apply	not apply	not apply	not apply	not apply	not apply	not apply	not apply	not apply	not apply	not apply
RHEZ	2012	19	<30	Male	Pulmonary		Cure	No	No	No	No	no	No	no	no	0	not apply	not apply	not apply	not apply	not apply	not apply	not apply	not apply	not apply	not apply	not apply	not apply
RHEZ	2014	19	<30	Male	Pulmonary		Cure	No	No	No	No	no	No	no	no	0	not apply	not apply	not apply	not apply	not apply	not apply	not apply	not apply	not apply	not apply	not apply	not apply
RHEZ	2012	28	<30	Female	Pulmonary		Cure	No	No	No	No	no	No	no	no	0	not apply	not apply	not apply	not apply	not apply	not apply	not apply	not apply	not apply	not apply	not apply	not apply
RHEZ	2010	27	<30	Female	Pulmonary	Negative	Cure	No	No	No	No	alcohol	No	no	no	0	not apply	not apply	not apply	not apply	not apply	not apply	not apply	not apply	not apply	not apply	not apply	not apply
RHEZ	2013	27	<30	Male	Pulmonary _ Pleural		Cure	No	No	No	Tobacco	alcohol	No	no	no	0	not apply	not apply	not apply	not apply	not apply	not apply	not apply	not apply	not apply	not apply	not apply	not apply
RHEZ	2012	18	<30	Female	Pulmonary		loss follow up	No	No	No	No	no	No	no	no	0	not apply	not apply	not apply	not apply	not apply	not apply	not apply	not apply	not apply	not apply	not apply	not apply
RHEZ	2012	23	<30	Female	Pulmonary		MDR	MDR	No	No	No	no	No	no	no	0	not apply	not apply	not apply	not apply	not apply	not apply	not apply	not apply	not apply	not apply	not apply	not apply
RHEZ	2011	28	<30	Female	Pulmonary	Negative	Cure	No	No	No	No	no	No	no	no	0	not apply	not apply	not apply	not apply	not apply	not apply	not apply	not apply	not apply	not apply	not apply	not apply
RHEZ	2011	24	<30	Male	Pulmonary	Negative	Cure	No	No	No	No	no	No	no	no	0	not apply	not apply	not apply	not apply	not apply	not apply	not apply	not apply	not apply	not apply	not apply	not apply
RHEZ	2010	28	<30	Male	Pulmonary		Cure	No	No	No	Tobacco	no	No	no	no	0	not apply	not apply	not apply	not apply	not apply	not apply	not apply	not apply	not apply	not apply	not apply	not apply
RHEZ	2013	26	<30	Female	Pulmonary	Negative	Cure	No	Diabetes	No	No	no	No	no	no	0	not apply	not apply	not apply	not apply	not apply	not apply	not apply	not apply	not apply	not apply	not apply	not apply
RHEZ	2010	20	<30	Male	Extrapulmonary		Cure	No	No	No	No	no	No	no	no	0	not apply	not apply	not apply	not apply	not apply	not apply	not apply	not apply	not apply	not apply	not apply	not apply
RHEZ	2013	24	<30	Female	Pulmonary	Negative	Cure	No	No	No	No	no	No	no	no	0	not apply	not apply	not apply	not apply	not apply	not apply	not apply	not apply	not apply	not apply	not apply	not apply
RHEZ	2012	21	<30	Male	Extrapulmonary		Cure	No	No	No	No	no	No	no	no	0	not apply	not apply	not apply	not apply	not apply	not apply	not apply	not apply	not apply	not apply	not apply	not apply
RHEZ	2011	26	<30	Male	Pulmonary	Negative	Cure	No	No	No	Tobacco	no	No	no	no	0	not apply	not apply	not apply	not apply	not apply	not apply	not apply	not apply	not apply	not apply	not apply	not apply
RHEZ	2011	24	<30	Female	Pulmonary		Cure	No	No	No	Tobacco	no	No	no	no	0	not apply	not apply	not apply	not apply	not apply	not apply	not apply	not apply	not apply	not apply	not apply	not apply
RHEZ	2011	24	<30	Female	Pulmonary	Negative	Cure	No	No	No	No	no	No	no	no	0	not apply	not apply	not apply	not apply	not apply	not apply	not apply	not apply	not apply	not apply	not apply	not apply
RHEZ	2014	20	<30	Female	Extrapulmonary		Cure	No	No	No	No	no	No	no	no	0	not apply	not apply	not apply	not apply	not apply	not apply	not apply	not apply	not apply	not apply	not apply	not apply
RHEZ	2012	22	<30	Male	Pulmonary	Negative	Cure	No	No	No	No	no	No	no	no	0	not apply	not apply	not apply	not apply	not apply	not apply	not apply	not apply	not apply	not apply	not apply	not apply
RHEZ	2010	25	<30	Female	Pulmonary	Negative	Cure	No	No	No	No	no	No	no	no	0	not apply	not apply	not apply	not apply	not apply	not apply	not apply	not apply	not apply	not apply	not apply	not apply
RHEZ	2014	25	<30	Female	Pulmonary	Negative	Cure	No	No	No	No	no	No	no	no	0	not apply	not apply	not apply	not apply	not apply	not apply	not apply	not apply	not apply	not apply	not apply	not apply
RHEZ	2010	19	<30	Male	Pulmonary		MDR	MDR	No	No	No	alcohol	No	no	no	0	not apply	not apply	not apply	not apply	not apply	not apply	not apply	not apply	not apply	not apply	not apply	not apply
RHEZ	2011	21	<30	Male	Pulmonary		Cure	No	No	No	Tobacco	no	No	no	no	0	not apply	not apply	not apply	not apply	not apply	not apply	not apply	not apply	not apply	not apply	not apply	not apply
RHEZ	2012	20	<30	Male	Pulmonary	Negative	Cure	No	No	No	No	no	No	no	no	0	not apply	not apply	not apply	not apply	not apply	not apply	not apply	not apply	not apply	not apply	not apply	not apply
RHEZ	2014	28	<30	Male	Pulmonary		Cure	No	No	No	No	no	No	no	no	0	not apply	not apply	not apply	not apply	not apply	not apply	not apply	not apply	not apply	not apply	not apply	not apply
RHEZ	2014	29	<30	Female	Pulmonary		Cure	No	No	No	No	no	No	no	no	0	not apply	not apply	not apply	not apply	not apply	not apply	not apply	not apply	not apply	not apply	not apply	not apply
RHEZ	2011	26	<30	Female	Extrapulmonary	Negative	Cure	No	No	No	No	no	No	no	no	0	not apply	not apply	not apply	not apply	not apply	not apply	not apply	not apply	not apply	not apply	not apply	not apply
RHEZ	2011	26	<30	Male	Pulmonary	Negative	Cure	No	No	No	No	no	No	no	no	0	not apply	not apply	not apply	not apply	not apply	not apply	not apply	not apply	not apply	not apply	not apply	not apply
RHEZ	2013	18	<30	Female	Pulmonary		Cure	No	No	No	No	no	No	no	no	0	not apply	not apply	not apply	not apply	not apply	not apply	not apply	not apply	not apply	not apply	not apply	not apply
RHEZ	2012	25	<30	Female	Pulmonary	Negative	Cure	No	Diabetes	No	No	no	No	no	no	0	not apply	not apply	not apply	not apply	not apply	not apply	not apply	not apply	not apply	not apply	not apply	not apply
RHEZ	2011	29	<30	Female	Pulmonary	Negative	Cure	No	No	No	No	no	No	no	no	0	not apply	not apply	not apply	not apply	not apply	not apply	not apply	not apply	not apply	not apply	not apply	not apply
RHEZ	2014	28	<30	Male	Pulmonary		MDR	MDR	No	No	No	no	No	no	no	0	not apply	not apply	not apply	not apply	not apply	not apply	not apply	not apply	not apply	not apply	not apply	not apply
RHEZ	2010	26	<30	Male	Pulmonary	Negative	Cure	No	No	No	No	no	No	no	no	0	not apply	not apply	not apply	not apply	not apply	not apply	not apply	not apply	not apply	not apply	not apply	not apply
RHEZ	2013	18	<30	Male	Pulmonary	Negative	Cure	No	No	No	No	no	No	no	no	0	not apply	not apply	not apply	not apply	not apply	not apply	not apply	not apply	not apply	not apply	not apply	not apply
RHEZ	2013	24	<30	Male	Pulmonary	Negative	Cure	No	No	No	No	no	No	no	no	0	not apply	not apply	not apply	not apply	not apply	not apply	not apply	not apply	not apply	not apply	not apply	not apply
RHEZ	2012	27	<30	Male	Pulmonary	Negative	Cure	No	No	No	No	no	No	no	no	0	not apply	not apply	not apply	not apply	not apply	not apply	not apply	not apply	not apply	not apply	not apply	not apply
RHEZ	2011	28	<30	Male	Extrapulmonary		Cure	No	No	No	No	no	No	no	no	0	not apply	not apply	not apply	not apply	not apply	not apply	not apply	not apply	not apply	not apply	not apply	not apply
RHZ	2009	21	<30	Male	Pulmonary	Negative	Cure	No	No	No	No	alcohol	yes	no	no	0	not apply	not apply	not apply	not apply	not apply	not apply	not apply	not apply	not apply	not apply	not apply	not apply
RHZ	2008	22	<30	Male	Pulmonary	Negative	Cure	No	No	No	No	no	No	no	no	0	not apply	not apply	not apply	not apply	not apply	not apply	not apply	not apply	not apply	not apply	not apply	not apply
RHZ	2007	22	<30	Male	Pulmonary	Negative	Cure	No	No	No	No	no	No	no	no	0	not apply	not apply	not apply	not apply	not apply	not apply	not apply	not apply	not apply	not apply	not apply	not apply
RHZ	2007	26	<30	Male	Pulmonary	Negative	Cure	No	No	No	No	no	No	no	no	0	not apply	not apply	not apply	not apply	not apply	not apply	not apply	not apply	not apply	not apply	not apply	not apply
RHZ	2008	22	<30	Female	Pulmonary	Negative	Cure	No	No	No	No	no	No	no	no	0	not apply	not apply	not apply	not apply	not apply	not apply	not apply	not apply	not apply	not apply	not apply	not apply
RHZ	2009	29	<30	Female	Extrapulmonary	Negative	Cure	No	No	No	No	alcohol	No	no	no	0	not apply	not apply	not apply	not apply	not apply	not apply	not apply	not apply	not apply	not apply	not apply	not apply
RHZ	2009	18	<30	Male	Pulmonary	Negative	Cure	No	No	No	No	alcohol	yes	no	no	0	not apply	not apply	not apply	not apply	not apply	not apply	not apply	not apply	not apply	not apply	not apply	not apply
RHZ	2007	24	<30	Male	Pulmonary	Negative	Cure	No	No	No	No	no	No	no	no	0	not apply	not apply	not apply	not apply	not apply	not apply	not apply	not apply	not apply	not apply	not apply	not apply
RHZ	2009	26	<30	Female	Pulmonary		Cure	No	No	No	No	no	No	no	no	0	not apply	not apply	not apply	not apply	not apply	not apply	not apply	not apply	not apply	not apply	not apply	not apply
RHZ	2008	24	<30	Male	Pulmonary		Cure	No	No	No	No	no	No	no	no	0	not apply	not apply	not apply	not apply	not apply	not apply	not apply	not apply	not apply	not apply	not apply	not apply
RHZ	2009	27	<30	Male	Pulmonary	Negative	Cure	No	No	No	No	no	No	no	no	0	not apply	not apply	not apply	not apply	not apply	not apply	not apply	not apply	not apply	not apply	not apply	not apply
RHZ	2008	23	<30	Female	Pulmonary	Negative	Cure	No	No	No	No	no	No	no	no	0	not apply	not apply	not apply	not apply	not apply	not apply	not apply	not apply	not apply	not apply	not apply	not apply
RHZ	2009	22	<30	Male	Pulmonary	Negative	loss follow up	No	Diabetes	No	Tobacco	no	No	no	no	0	not apply	not apply	not apply	not apply	not apply	not apply	not apply	not apply	not apply	not apply	not apply	not apply
RHZ	2009	25	<30	Male	Pulmonary	Negative	Cure	No	No	No	No	no	No	no	no	0	not apply	not apply	not apply	not apply	not apply	not apply	not apply	not apply	not apply	not apply	not apply	not apply
RHZ	2008	28	<30	Male	Pulmonary	Negative	Cure	No	No	No	No	no	No	no	no	0	not apply	not apply	not apply	not apply	not apply	not apply	not apply	not apply	not apply	not apply	not apply	not apply
RHZ	2008	25	<30	Female	Pulmonary	Negative	Cure	No	No	No	No	no	No	no	no	0	not apply	not apply	not apply	not apply	not apply	not apply	not apply	not apply	not apply	not apply	not apply	not apply
RHZ	2007	25	<30	Female	Pulmonary		loss follow up	No	No	No	No	no	No	no	no	0	not apply	not apply	not apply	not apply	not apply	not apply	not apply	not apply	not apply	not apply	not apply	not apply
RHZ	2009	29	<30	Male	Pulmonary	+	loss follow up	No	No	No	No	no	No	no	no	0	not apply	not apply	not apply	not apply	not apply	not apply	not apply	not apply	not apply	not apply	not apply	not apply
RHZ	2008	28	<30	Male	Pulmonary	Negative	Cure	No	No	No	Tobacco	no	No	no	no	0	not apply	not apply	not apply	not apply	not apply	not apply	not apply	not apply	not apply	not apply	not apply	not apply
RHZ	2009	23	<30	Female	Pulmonary		Cure	No	No	No	No	no	No	no	no	0	not apply	not apply	not apply	not apply	not apply	not apply	not apply	not apply	not apply	not apply	not apply	not apply
RHZ	2008	21	<30	Male	Pulmonary	Negative	Cure	No	No	No	No	no	No	no	no	0	not apply	not apply	not apply	not apply	not apply	not apply	not apply	not apply	not apply	not apply	not apply	not apply
RHZ	2008	28	<30	Female	Pulmonary	Negative	Cure	No	No	No	No	no	No	no	no	0	not apply	not apply	not apply	not apply	not apply	not apply	not apply	not apply	not apply	not apply	not apply	not apply
RHZ	2008	21	<30	Male	Pulmonary		loss follow up	No	No	No	No	no	No	no	no	0	not apply	not apply	not apply	not apply	not apply	not apply	not apply	not apply	not apply	not apply	not apply	not apply
RHZ	2008	25	<30	Female	Pulmonary	Negative	Cure	No	No	No	No	no	No	no	no	0	not apply	not apply	not apply	not apply	not apply	not apply	not apply	not apply	not apply	not apply	not apply	not apply
RHZ	2008	23	<30	Male	Pulmonary	Negative	Cure	No	No	No	No	no	No	no	no	0	not apply	not apply	not apply	not apply	not apply	not apply	not apply	not apply	not apply	not apply	not apply	not apply
RHZ	2008	26	<30	Female	Pulmonary		loss follow up	No	No	No	No	no	No	no	no	0	not apply	not apply	not apply	not apply	not apply	not apply	not apply	not apply	not apply	not apply	not apply	not apply
RHZ	2008	22	<30	Female	Pulmonary	Negative	Cure	No	No	No	No	no	No	no	no	0	not apply	not apply	not apply	not apply	not apply	not apply	not apply	not apply	not apply	not apply	not apply	not apply
RHZ	2008	28	<30	Male	Pulmonary		loss follow up	No	No	No	No	no	No	no	no	0	not apply	not apply	not apply	not apply	not apply	not apply	not apply	not apply	not apply	not apply	not apply	not apply
RHZ	2009	23	<30	Female	Pulmonary	Negative	Cure	No	No	No	No	no	No	no	no	0	not apply	not apply	not apply	not apply	not apply	not apply	not apply	not apply	not apply	not apply	not apply	not apply
RHZ	2008	27	<30	Female	Pulmonary	Negative	Cure	No	No	No	No	no	No	no	no	0	not apply	not apply	not apply	not apply	not apply	not apply	not apply	not apply	not apply	not apply	not apply	not apply
RHZ	2008	28	<30	Male	Pulmonary	Negative	Cure	No	No	No	No	no	No	no	no	0	not apply	not apply	not apply	not apply	not apply	not apply	not apply	not apply	not apply	not apply	not apply	not apply
RHZ	2008	27	<30	Female	Pulmonary	Negative	Cure	No	No	No	No	no	No	no	no	0	not apply	not apply	not apply	not apply	not apply	not apply	not apply	not apply	not apply	not apply	not apply	not apply
RHZ	2009	23	<30	Male	Pulmonary	Negative	Cure	No	No	No	No	no	No	no	no	0	not apply	not apply	not apply	not apply	not apply	not apply	not apply	not apply	not apply	not apply	not apply	not apply
RHZ	2008	20	<30	Male	Pulmonary		loss follow up	No	No	No	No	no	No	no	no	0	not apply	not apply	not apply	not apply	not apply	not apply	not apply	not apply	not apply	not apply	not apply	not apply
RHZ	2009	22	<30	Female	Pulmonary	Negative	Cure	No	No	No	No	no	No	no	no	0	not apply	not apply	not apply	not apply	not apply	not apply	not apply	not apply	not apply	not apply	not apply	not apply
RHZ	2009	23	<30	Male	Pulmonary		Cure	No	No	No	No	no	No	no	no	0	not apply	not apply	not apply	not apply	not apply	not apply	not apply	not apply	not apply	not apply	not apply	not apply
RHZ	2009	29	<30	Male	Pulmonary	Negative	Cure	No	No	No	Tobacco	no	No	no	no	0	not apply	not apply	not apply	not apply	not apply	not apply	not apply	not apply	not apply	not apply	not apply	not apply
RHZ	2008	29	<30	Female	Pulmonary	Negative	MDR	MDR	No	No	No	no	No	no	no	0	not apply	not apply	not apply	not apply	not apply	not apply	not apply	not apply	not apply	not apply	not apply	not apply
RHZ	2008	28	<30	Female	Pulmonary		Cure	No	No	No	No	no	No	no	no	0	not apply	not apply	not apply	not apply	not apply	not apply	not apply	not apply	not apply	not apply	not apply	not apply
RHZ	2008	23	<30	Male	Pulmonary	Negative	Cure	No	No	No	No	no	No	no	no	0	not apply	not apply	not apply	not apply	not apply	not apply	not apply	not apply	not apply	not apply	not apply	not apply
RHZ	2007	23	<30	Male	Pulmonary	Negative	Cure	No	No	No	Tobacco	no	No	no	no	0	not apply	not apply	not apply	not apply	not apply	not apply	not apply	not apply	not apply	not apply	not apply	not apply
RHZ	2009	23	<30	Female	Pulmonary	Negative	Cure	No	No	No	No	no	No	no	no	0	not apply	not apply	not apply	not apply	not apply	not apply	not apply	not apply	not apply	not apply	not apply	not apply
RHZ	2008	25	<30	Female	Pulmonary		Cure	No	No	No	No	no	No	no	no	0	not apply	not apply	not apply	not apply	not apply	not apply	not apply	not apply	not apply	not apply	not apply	not apply
RHZ	2009	23	<30	Male	Extrapulmonary		Cure	No	No	No	No	no	No	no	no	0	not apply	not apply	not apply	not apply	not apply	not apply	not apply	not apply	not apply	not apply	not apply	not apply
RHZ	2009	23	<30	Female	Pulmonary		Cure	No	No	No	No	no	No	no	no	0	not apply	not apply	not apply	not apply	not apply	not apply	not apply	not apply	not apply	not apply	not apply	not apply
RHZ	2008	18	<30	Female	Pulmonary	Negative	Cure	No	No	No	No	no	No	no	no	0	not apply	not apply	not apply	not apply	not apply	not apply	not apply	not apply	not apply	not apply	not apply	not apply
RHZ	2007	21	<30	Female	Extrapulmonary		Cure	No	No	No	No	no	No	no	no	0	not apply	not apply	not apply	not apply	not apply	not apply	not apply	not apply	not apply	not apply	not apply	not apply
RHZ	2009	23	<30	Female	Pulmonary		loss follow up	No	No	No	No	no	No	no	no	0	not apply	not apply	not apply	not apply	not apply	not apply	not apply	not apply	not apply	not apply	not apply	not apply
RHZ	2007	18	<30	Female	Pulmonary	Negative	Cure	No	No	No	No	no	No	no	no	0	not apply	not apply	not apply	not apply	not apply	not apply	not apply	not apply	not apply	not apply	not apply	not apply
RHZ	2007	20	<30	Male	Pulmonary		Cure	No	No	No	No	no	No	no	no	0	not apply	not apply	not apply	not apply	not apply	not apply	not apply	not apply	not apply	not apply	not apply	not apply
RHZ	2008	23	<30	Male	Pulmonary	Negative	Cure	No	No	No	No	no	No	no	no	0	not apply	not apply	not apply	not apply	not apply	not apply	not apply	not apply	not apply	not apply	not apply	not apply
RHZ	2008	29	<30	Male	Pulmonary	Negative	Cure	No	No	No	No	no	No	no	no	0	not apply	not apply	not apply	not apply	not apply	not apply	not apply	not apply	not apply	not apply	not apply	not apply
RHZ	2007	20	<30	Male	Pulmonary	Negative	Cure	No	No	No	No	no	No	no	no	0	not apply	not apply	not apply	not apply	not apply	not apply	not apply	not apply	not apply	not apply	not apply	not apply
RHZ	2009	29	<30	Male	Pulmonary	Negative	Cure	No	No	No	No	no	No	no	no	0	not apply	not apply	not apply	not apply	not apply	not apply	not apply	not apply	not apply	not apply	not apply	not apply
RHZ	2008	29	<30	Female	Pulmonary	Negative	Cure	No	No	No	No	no	No	no	no	0	not apply	not apply	not apply	not apply	not apply	not apply	not apply	not apply	not apply	not apply	not apply	not apply
RHZ	2009	26	<30	Female	Pulmonary		Cure	No	No	No	No	no	No	no	no	0	not apply	not apply	not apply	not apply	not apply	not apply	not apply	not apply	not apply	not apply	not apply	not apply
RHZ	2007	28	<30	Male	Pulmonary		MDR	MDR	No	No	No	no	No	no	no	0	not apply	not apply	not apply	not apply	not apply	not apply	not apply	not apply	not apply	not apply	not apply	not apply
RHZ	2008	29	<30	Male	Pulmonary		loss follow up	No	No	No	No	no	No	no	no	0	not apply	not apply	not apply	not apply	not apply	not apply	not apply	not apply	not apply	not apply	not apply	not apply
RHZ	2007	20	<30	Female	Pulmonary	Negative	Cure	No	No	No	No	no	No	no	no	0	not apply	not apply	not apply	not apply	not apply	not apply	not apply	not apply	not apply	not apply	not apply	not apply
RHZ	2007	25	<30	Female	Pulmonary _ Pleural	Negative	Cure	No	No	No	No	no	No	no	no	0	not apply	not apply	not apply	not apply	not apply	not apply	not apply	not apply	not apply	not apply	not apply	not apply
RHZ	2008	29	<30	Male	Pulmonary		Cure	No	No	No	No	no	No	no	no	0	not apply	not apply	not apply	not apply	not apply	not apply	not apply	not apply	not apply	not apply	not apply	not apply
RHZ	2009	24	<30	Female	Pulmonary	Negative	Cure	No	No	No	No	no	No	no	no	0	not apply	not apply	not apply	not apply	not apply	not apply	not apply	not apply	not apply	not apply	not apply	not apply
RHZ	2007	21	<30	Male	Pulmonary	Negative	Cure	No	No	No	No	no	No	no	no	0	not apply	not apply	not apply	not apply	not apply	not apply	not apply	not apply	not apply	not apply	not apply	not apply
RHZ	2009	18	<30	Female	Pulmonary	Negative	Cure	No	No	No	No	alcohol	yes	no	no	0	not apply	not apply	not apply	not apply	not apply	not apply	not apply	not apply	not apply	not apply	not apply	not apply
RHZ	2007	19	<30	Female	Pulmonary	Negative	Cure	No	No	No	No	no	No	no	no	0	not apply	not apply	not apply	not apply	not apply	not apply	not apply	not apply	not apply	not apply	not apply	not apply
RHZ	2009	18	<30	Female	Pulmonary	Negative	Cure	No	No	No	No	no	No	no	no	0	not apply	not apply	not apply	not apply	not apply	not apply	not apply	not apply	not apply	not apply	not apply	not apply
RHZ	2007	22	<30	Male	Pulmonary	Negative	Cure	No	No	No	No	no	No	no	no	0	not apply	not apply	not apply	not apply	not apply	not apply	not apply	not apply	not apply	not apply	not apply	not apply
RHZ	2008	28	<30	Male	Pulmonary	Negative	Cure	No	No	No	No	no	No	no	no	0	not apply	not apply	not apply	not apply	not apply	not apply	not apply	not apply	not apply	not apply	not apply	not apply
RHZ	2007	27	<30	Male	Pulmonary	Negative	loss follow up	No	No	No	No	no	No	no	no	0	not apply	not apply	not apply	not apply	not apply	not apply	not apply	not apply	not apply	not apply	not apply	not apply
RHZ	2009	24	<30	Male	Extrapulmonary		Cure	No	No	No	Tobacco	no	No	no	no	0	not apply	not apply	not apply	not apply	not apply	not apply	not apply	not apply	not apply	not apply	not apply	not apply
RHZ	2009	22	<30	Female	Pulmonary		Cure	No	No	No	No	no	No	no	no	0	not apply	not apply	not apply	not apply	not apply	not apply	not apply	not apply	not apply	not apply	not apply	not apply
RHZ	2008	23	<30	Male	Pulmonary	Negative	Cure	No	No	No	No	no	No	no	no	0	not apply	not apply	not apply	not apply	not apply	not apply	not apply	not apply	not apply	not apply	not apply	not apply
RHZ	2007	29	<30	Female	Pulmonary	Negative	Cure	No	No	No	No	no	No	no	no	0	not apply	not apply	not apply	not apply	not apply	not apply	not apply	not apply	not apply	not apply	not apply	not apply
RHZ	2008	21	<30	Male	Pulmonary	Negative	Cure	No	No	No	No	no	No	no	no	0	not apply	not apply	not apply	not apply	not apply	not apply	not apply	not apply	not apply	not apply	not apply	not apply
RHZ	2009	29	<30	Male	Extrapulmonary		Cure	No	No	No	No	alcohol	No	no	no	0	not apply	not apply	not apply	not apply	not apply	not apply	not apply	not apply	not apply	not apply	not apply	not apply
RHZ	2008	21	<30	Female	Extrapulmonary		Cure	No	No	No	No	no	No	no	no	0	not apply	not apply	not apply	not apply	not apply	not apply	not apply	not apply	not apply	not apply	not apply	not apply
RHZ	2009	24	<30	Male	Pulmonary	Negative	Cure	No	No	No	No	no	No	no	no	0	not apply	not apply	not apply	not apply	not apply	not apply	not apply	not apply	not apply	not apply	not apply	not apply
RHZ	2009	28	<30	Male	Pulmonary	Negative	Cure	No	No	No	No	no	No	no	no	0	not apply	not apply	not apply	not apply	not apply	not apply	not apply	not apply	not apply	not apply	not apply	not apply
RHZ	2009	21	<30	Male	Pulmonary		Cure	No	Diabetes	No	No	no	No	no	no	0	not apply	not apply	not apply	not apply	not apply	not apply	not apply	not apply	not apply	not apply	not apply	not apply
RHZ	2009	21	<30	Male	Pulmonary	Negative	Cure	No	No	No	No	alcohol	yes	no	no	0	not apply	not apply	not apply	not apply	not apply	not apply	not apply	not apply	not apply	not apply	not apply	not apply
RHZ	2008	23	<30	Female	Pulmonary		Cure	No	No	No	No	no	No	no	no	0	not apply	not apply	not apply	not apply	not apply	not apply	not apply	not apply	not apply	not apply	not apply	not apply
RHZ	2009	19	<30	Male	Pulmonary	Negative	Cure	No	No	No	No	no	No	no	no	0	not apply	not apply	not apply	not apply	not apply	not apply	not apply	not apply	not apply	not apply	not apply	not apply
RHZ	2007	22	<30	Male	Pulmonary	Negative	loss follow up	No	No	No	Tobacco	no	No	no	no	0	not apply	not apply	not apply	not apply	not apply	not apply	not apply	not apply	not apply	not apply	not apply	not apply
RHZ	2009	24	<30	Female	Pulmonary	Negative	MDR	MDR	No	No	Tobacco	no	No	no	no	0	not apply	not apply	not apply	not apply	not apply	not apply	not apply	not apply	not apply	not apply	not apply	not apply
RHZ	2009	29	<30	Female	Pulmonary	Negative	Cure	No	No	No	No	no	No	no	no	0	not apply	not apply	not apply	not apply	not apply	not apply	not apply	not apply	not apply	not apply	not apply	not apply
RHZ	2009	18	<30	Female	Pulmonary	Negative	Cure	No	No	No	No	no	No	no	no	0	not apply	not apply	not apply	not apply	not apply	not apply	not apply	not apply	not apply	not apply	not apply	not apply
RHZ	2007	25	<30	Male	Pulmonary	Negative	Cure	No	No	No	No	no	No	no	no	0	not apply	not apply	not apply	not apply	not apply	not apply	not apply	not apply	not apply	not apply	not apply	not apply
RHZ	2009	20	<30	Male	Extrapulmonary	Negative	Cure	No	No	No	Tobacco	no	No	no	no	0	not apply	not apply	not apply	not apply	not apply	not apply	not apply	not apply	not apply	not apply	not apply	not apply
RHZ	2009	27	<30	Male	Pulmonary	Negative	Cure	No	No	No	No	no	No	no	no	0	not apply	not apply	not apply	not apply	not apply	not apply	not apply	not apply	not apply	not apply	not apply	not apply
RHZ	2009	28	<30	Male	Pulmonary	Negative	Cure	No	No	No	No	no	No	no	no	0	not apply	not apply	not apply	not apply	not apply	not apply	not apply	not apply	not apply	not apply	not apply	not apply
RHZ	2007	29	<30	Male	Pulmonary		Cure	No	No	No	No	no	No	no	no	0	not apply	not apply	not apply	not apply	not apply	not apply	not apply	not apply	not apply	not apply	not apply	not apply
RHZ	2007	24	<30	Female	Pulmonary	Negative	Cure	No	No	No	No	no	No	no	no	0	not apply	not apply	not apply	not apply	not apply	not apply	not apply	not apply	not apply	not apply	not apply	not apply
RHZ	2009	25	<30	Male	Pulmonary	Negative	Cure	No	No	No	No	no	No	no	no	0	not apply	not apply	not apply	not apply	not apply	not apply	not apply	not apply	not apply	not apply	not apply	not apply
RHZ	2007	18	<30	Female	Pulmonary	Negative	Cure	No	No	No	No	no	No	no	no	0	not apply	not apply	not apply	not apply	not apply	not apply	not apply	not apply	not apply	not apply	not apply	not apply
RHZ	2007	18	<30	Female	Pulmonary	Negative	Cure	No	No	No	No	no	No	no	no	0	not apply	not apply	not apply	not apply	not apply	not apply	not apply	not apply	not apply	not apply	not apply	not apply
RHZ	2007	23	<30	Female	Pulmonary	Negative	Cure	No	No	No	No	no	No	no	no	0	not apply	not apply	not apply	not apply	not apply	not apply	not apply	not apply	not apply	not apply	not apply	not apply
RHZ	2007	24	<30	Female	Extrapulmonary	Negative	Cure	No	No	No	No	no	No	no	no	0	not apply	not apply	not apply	not apply	not apply	not apply	not apply	not apply	not apply	not apply	not apply	not apply
RHZ	2008	19	<30	Male	Pulmonary	Negative	Cure	No	No	No	No	no	No	no	no	0	not apply	not apply	not apply	not apply	not apply	not apply	not apply	not apply	not apply	not apply	not apply	not apply
RHZ	2009	26	<30	Male	Pulmonary	Negative	death	No	No	No	No	no	No	no	no	0	not apply	not apply	not apply	not apply	not apply	not apply	not apply	not apply	not apply	not apply	not apply	not apply
RHZ	2008	28	<30	Male	Pulmonary	Negative	Cure	No	No	No	No	no	No	no	no	0	not apply	not apply	not apply	not apply	not apply	not apply	not apply	not apply	not apply	not apply	not apply	not apply
RHZ	2009	20	<30	Male	Extrapulmonary		Cure	No	No	No	No	no	No	no	no	0	not apply	not apply	not apply	not apply	not apply	not apply	not apply	not apply	not apply	not apply	not apply	not apply
RHZ	2009	26	<30	Female	Extrapulmonary	Negative	Cure	No	No	No	No	no	No	no	no	0	not apply	not apply	not apply	not apply	not apply	not apply	not apply	not apply	not apply	not apply	not apply	not apply
RHZ	2008	28	<30	Female	Pulmonary		Cure	No	Diabetes	No	Tobacco	no	No	yes	no	0	not apply	not apply	not apply	not apply	not apply	not apply	not apply	not apply	not apply	not apply	not apply	not apply
RHZ	2007	26	<30	Male	Pulmonary	Negative	Cure	No	No	No	No	no	No	no	no	0	not apply	not apply	not apply	not apply	not apply	not apply	not apply	not apply	not apply	not apply	not apply	not apply
RHZ	2009	18	<30	Female	Pulmonary	Negative	Cure	No	No	No	No	alcohol	No	no	no	0	not apply	not apply	not apply	not apply	not apply	not apply	not apply	not apply	not apply	not apply	not apply	not apply
RHZ	2008	20	<30	Female	Pulmonary	Negative	Cure	No	No	No	No	no	No	no	no	0	not apply	not apply	not apply	not apply	not apply	not apply	not apply	not apply	not apply	not apply	not apply	not apply
RHZ	2009	26	<30	Female	Pulmonary	Negative	Cure	No	No	No	No	no	No	no	no	0	not apply	not apply	not apply	not apply	not apply	not apply	not apply	not apply	not apply	not apply	not apply	not apply
RHZ	2007	28	<30	Female	Pulmonary	Negative	Cure	No	No	No	No	no	No	no	no	0	not apply	not apply	not apply	not apply	not apply	not apply	not apply	not apply	not apply	not apply	not apply	not apply
RHZ	2008	24	<30	Female	Pulmonary		loss follow up	No	No	No	No	no	No	no	no	0	not apply	not apply	not apply	not apply	not apply	not apply	not apply	not apply	not apply	not apply	not apply	not apply
RHZ	2009	19	<30	Male	Pulmonary	Negative	Cure	No	No	No	No	no	No	no	no	0	not apply	not apply	not apply	not apply	not apply	not apply	not apply	not apply	not apply	not apply	not apply	not apply
RHZ	2007	20	<30	Male	Pulmonary	Negative	Cure	No	No	No	No	no	No	no	no	0	not apply	not apply	not apply	not apply	not apply	not apply	not apply	not apply	not apply	not apply	not apply	not apply
RHZ	2009	29	<30	Male	Extrapulmonary		Cure	No	No	No	No	alcohol	No	no	no	0	not apply	not apply	not apply	not apply	not apply	not apply	not apply	not apply	not apply	not apply	not apply	not apply
RHZ	2008	29	<30	Female	Pulmonary	Negative	Cure	No	No	No	No	no	No	no	no	0	not apply	not apply	not apply	not apply	not apply	not apply	not apply	not apply	not apply	not apply	not apply	not apply
RHZ	2007	23	<30	Female	Pulmonary		Cure	No	No	No	No	no	No	no	no	0	not apply	not apply	not apply	not apply	not apply	not apply	not apply	not apply	not apply	not apply	not apply	not apply
RHZ	2008	26	<30	Male	Pulmonary	Negative	Cure	No	No	No	No	no	No	no	no	0	not apply	not apply	not apply	not apply	not apply	not apply	not apply	not apply	not apply	not apply	not apply	not apply
RHZ	2008	24	<30	Male	Pulmonary		Cure	No	No	No	No	no	No	no	no	0	not apply	not apply	not apply	not apply	not apply	not apply	not apply	not apply	not apply	not apply	not apply	not apply
RHZ	2008	25	<30	Male	Pulmonary	Negative	Cure	No	No	No	No	no	No	no	no	0	not apply	not apply	not apply	not apply	not apply	not apply	not apply	not apply	not apply	not apply	not apply	not apply
RHZ	2008	24	<30	Male	Pulmonary		loss follow up	No	No	No	No	no	No	no	no	0	not apply	not apply	not apply	not apply	not apply	not apply	not apply	not apply	not apply	not apply	not apply	not apply
RHZ	2009	24	<30	Male	Extrapulmonary		Cure	No	No	No	No	no	No	no	no	0	not apply	not apply	not apply	not apply	not apply	not apply	not apply	not apply	not apply	not apply	not apply	not apply
RHEZ	2010	62	>=30	Male	Pulmonary	Negative	Cure	No	No	Hipertensão	No	no	No	no	no	0	not apply	not apply	not apply	not apply	not apply	not apply	not apply	not apply	not apply	not apply	not apply	not apply
RHEZ	2012	52	>=30	Female	Pulmonary	Negative	Cure	No	Diabetes	Hipertensão	No	no	No	no	no	0	not apply	not apply	not apply	not apply	not apply	not apply	not apply	not apply	not apply	not apply	not apply	not apply
RHEZ	2014	38	>=30	Female	Extrapulmonary		Cure	No	No	Hipertensão	No	no	No	no	no	0	not apply	not apply	not apply	not apply	not apply	not apply	not apply	not apply	not apply	not apply	not apply	not apply
RHEZ	2014	37	>=30	Male	Pulmonary	Negative	Cure	No	No	No	No	no	No	no	no	0	not apply	not apply	not apply	not apply	not apply	not apply	not apply	not apply	not apply	not apply	not apply	not apply
RHEZ	2010	39	>=30	Male	Extrapulmonary		Cure	No	No	No	Tobacco	no	No	no	no	0	not apply	not apply	not apply	not apply	not apply	not apply	not apply	not apply	not apply	not apply	not apply	not apply
RHEZ	2014	36	>=30	Male	Pulmonary		Cure	No	No	No	No	no	No	no	no	0	not apply	not apply	not apply	not apply	not apply	not apply	not apply	not apply	not apply	not apply	not apply	not apply
RHEZ	2012	59	>=30	Male	Pulmonary		Cure	No	Diabetes	No	No	no	No	no	no	0	not apply	not apply	not apply	not apply	not apply	not apply	not apply	not apply	not apply	not apply	not apply	not apply
RHEZ	2012	33	>=30	Male	Extrapulmonary		Cure	No	No	No	No	no	No	no	no	0	not apply	not apply	not apply	not apply	not apply	not apply	not apply	not apply	not apply	not apply	not apply	not apply
RHEZ	2013	37	>=30	Female	Pulmonary	Negative	Cure	No	No	No	No	no	No	no	no	0	not apply	not apply	not apply	not apply	not apply	not apply	not apply	not apply	not apply	not apply	not apply	not apply
RHEZ	2014	30	>=30	Male	Pulmonary	Negative	Cure	No	No	No	No	no	No	no	no	0	not apply	not apply	not apply	not apply	not apply	not apply	not apply	not apply	not apply	not apply	not apply	not apply
RHEZ	2013	41	>=30	Male	Extrapulmonary		Cure	No	No	No	No	no	No	no	no	0	not apply	not apply	not apply	not apply	not apply	not apply	not apply	not apply	not apply	not apply	not apply	not apply
RHEZ	2013	37	>=30	Male	Pulmonary	Negative	Cure	No	No	No	No	no	No	no	no	0	not apply	not apply	not apply	not apply	not apply	not apply	not apply	not apply	not apply	not apply	not apply	not apply
RHEZ	2012	38	>=30	Female	Pulmonary		Cure	No	No	No	No	no	No	no	no	0	not apply	not apply	not apply	not apply	not apply	not apply	not apply	not apply	not apply	not apply	not apply	not apply
RHEZ	2011	48	>=30	Female	Pulmonary	Negative	Cure	No	No	No	No	alcohol	No	no	no	0	not apply	not apply	not apply	not apply	not apply	not apply	not apply	not apply	not apply	not apply	not apply	not apply
RHEZ	2013	46	>=30	Male	Pulmonary _ Pleural		Cure	No	No	No	Tobacco	alcohol	No	no	no	0	not apply	not apply	not apply	not apply	not apply	not apply	not apply	not apply	not apply	not apply	not apply	not apply
RHEZ	2010	60	>=30	Male	Pulmonary	Negative	Cure	No	No	No	Tobacco	alcohol	No	no	no	0	not apply	not apply	not apply	not apply	not apply	not apply	not apply	not apply	not apply	not apply	not apply	not apply
RHEZ	2010	38	>=30	Male	Pulmonary	Negative	Cure	No	No	No	No	no	No	no	no	0	not apply	not apply	not apply	not apply	not apply	not apply	not apply	not apply	not apply	not apply	not apply	not apply
RHEZ	2013	54	>=30	Male	Pulmonary	Negative	Cure	No	Diabetes	No	No	no	No	no	no	0	not apply	not apply	not apply	not apply	not apply	not apply	not apply	not apply	not apply	not apply	not apply	not apply
RHEZ	2011	45	>=30	Male	Pulmonary	Negative	Cure	No	No	No	Tobacco	alcohol	No	no	no	0	not apply	not apply	not apply	not apply	not apply	not apply	not apply	not apply	not apply	not apply	not apply	not apply
RHEZ	2011	45	>=30	Male	Pulmonary	Negative	Cure	No	No	No	No	alcohol	No	no	no	0	not apply	not apply	not apply	not apply	not apply	not apply	not apply	not apply	not apply	not apply	not apply	not apply
RHEZ	2014	39	>=30	Male	Pulmonary		Cure	No	No	No	Tobacco	alcohol	No	no	no	0	not apply	not apply	not apply	not apply	not apply	not apply	not apply	not apply	not apply	not apply	not apply	not apply
RHEZ	2014	39	>=30	Male	Pulmonary	Negative	Cure	No	No	No	No	no	No	no	no	0	not apply	not apply	not apply	not apply	not apply	not apply	not apply	not apply	not apply	not apply	not apply	not apply
RHEZ	2011	50	>=30	Male	Pulmonary	Negative	Cure	No	No	No	No	alcohol	No	no	no	0	not apply	not apply	not apply	not apply	not apply	not apply	not apply	not apply	not apply	not apply	not apply	not apply
RHEZ	2011	32	>=30	Male	Pulmonary	Negative	Cure	No	No	No	No	no	No	no	no	0	not apply	not apply	not apply	not apply	not apply	not apply	not apply	not apply	not apply	not apply	not apply	not apply
RHEZ	2014	59	>=30	Female	Extrapulmonary		Cure	No	Diabetes	No	Tobacco	no	No	no	no	0	not apply	not apply	not apply	not apply	not apply	not apply	not apply	not apply	not apply	not apply	not apply	not apply
RHEZ	2010	30	>=30	Female	Pulmonary	Negative	Cure	No	No	No	Tobacco	alcohol	No	no	no	0	not apply	not apply	not apply	not apply	not apply	not apply	not apply	not apply	not apply	not apply	not apply	not apply
RHEZ	2010	40	>=30	Female	Pulmonary	Negative	Cure	No	No	No	No	no	No	no	no	0	not apply	not apply	not apply	not apply	not apply	not apply	not apply	not apply	not apply	not apply	not apply	not apply
RHEZ	2011	38	>=30	Male	Pulmonary		Cure	No	No	No	Tobacco	alcohol	No	no	no	0	not apply	not apply	not apply	not apply	not apply	not apply	not apply	not apply	not apply	not apply	not apply	not apply
RHEZ	2012	45	>=30	Female	Pulmonary		Cure	No	No	No	No	no	No	no	no	0	not apply	not apply	not apply	not apply	not apply	not apply	not apply	not apply	not apply	not apply	not apply	not apply
RHEZ	2014	42	>=30	Female	Pulmonary	Negative	Cure	No	No	No	No	no	No	no	no	0	not apply	not apply	not apply	not apply	not apply	not apply	not apply	not apply	not apply	not apply	not apply	not apply
RHEZ	2014	44	>=30	Male	Pulmonary	Negative	Cure	No	No	No	Tobacco	no	No	no	no	0	not apply	not apply	not apply	not apply	not apply	not apply	not apply	not apply	not apply	not apply	not apply	not apply
RHEZ	2013	48	>=30	Male	Pulmonary		Cure	No	No	No	No	no	No	no	no	0	not apply	not apply	not apply	not apply	not apply	not apply	not apply	not apply	not apply	not apply	not apply	not apply
RHEZ	2013	50	>=30	Female	Pulmonary	Negative	Cure	No	No	No	No	no	No	no	no	0	not apply	not apply	not apply	not apply	not apply	not apply	not apply	not apply	not apply	not apply	not apply	not apply
RHEZ	2011	44	>=30	Male	Pulmonary	Negative	Cure	No	No	No	Tobacco	alcohol	No	no	no	0	not apply	not apply	not apply	not apply	not apply	not apply	not apply	not apply	not apply	not apply	not apply	not apply
RHEZ	2010	33	>=30	Female	Pulmonary		Cure	No	No	No	Tobacco	no	No	no	no	0	not apply	not apply	not apply	not apply	not apply	not apply	not apply	not apply	not apply	not apply	not apply	not apply
RHEZ	2013	37	>=30	Female	Pulmonary		Cure	No	No	No	No	no	No	no	no	0	not apply	not apply	not apply	not apply	not apply	not apply	not apply	not apply	not apply	not apply	not apply	not apply
RHEZ	2012	57	>=30	Male	Pulmonary	Negative	Cure	No	Diabetes	No	Tobacco	no	No	no	no	0	not apply	not apply	not apply	not apply	not apply	not apply	not apply	not apply	not apply	not apply	not apply	not apply
RHEZ	2011	36	>=30	Male	Pulmonary		Cure	No	No	No	No	no	No	no	no	0	not apply	not apply	not apply	not apply	not apply	not apply	not apply	not apply	not apply	not apply	not apply	not apply
RHEZ	2012	56	>=30	Male	Pulmonary	Negative	Cure	No	No	No	No	no	No	no	no	0	not apply	not apply	not apply	not apply	not apply	not apply	not apply	not apply	not apply	not apply	not apply	not apply
RHEZ	2013	30	>=30	Male	Extrapulmonary		MDR	MDR	No	No	No	no	No	no	no	0	not apply	not apply	not apply	not apply	not apply	not apply	not apply	not apply	not apply	not apply	not apply	not apply
RHEZ	2013	32	>=30	Female	Pulmonary	Negative	Cure	No	No	No	Tobacco	no	No	no	no	0	not apply	not apply	not apply	not apply	not apply	not apply	not apply	not apply	not apply	not apply	not apply	not apply
RHEZ	2014	32	>=30	Female	Pulmonary	+	Cure	No	No	No	No	no	No	no	no	0	not apply	not apply	not apply	not apply	not apply	not apply	not apply	not apply	not apply	not apply	not apply	not apply
RHEZ	2013	35	>=30	Male	Pulmonary		loss follow up	No	No	No	No	alcohol	No	no	no	0	not apply	not apply	not apply	not apply	not apply	not apply	not apply	not apply	not apply	not apply	not apply	not apply
RHEZ	2014	32	>=30	Female	Pulmonary	Negative	Cure	No	No	No	No	no	No	no	no	0	not apply	not apply	not apply	not apply	not apply	not apply	not apply	not apply	not apply	not apply	not apply	not apply
RHEZ	2014	53	>=30	Female	Pulmonary	Negative	Cure	No	No	No	No	no	No	no	no	0	not apply	not apply	not apply	not apply	not apply	not apply	not apply	not apply	not apply	not apply	not apply	not apply
RHEZ	2010	54	>=30	Male	Pulmonary	Negative	Cure	No	No	No	Tobacco	alcohol	No	no	no	0	not apply	not apply	not apply	not apply	not apply	not apply	not apply	not apply	not apply	not apply	not apply	not apply
RHEZ	2012	55	>=30	Male	Pulmonary	++	MDR	MDR	No	No	No	no	No	no	no	0	not apply	not apply	not apply	not apply	not apply	not apply	not apply	not apply	not apply	not apply	not apply	not apply
RHEZ	2014	31	>=30	Male	Pulmonary	Negative	Cure	No	No	No	No	no	No	no	no	0	not apply	not apply	not apply	not apply	not apply	not apply	not apply	not apply	not apply	not apply	not apply	not apply
RHEZ	2011	31	>=30	Female	Pulmonary	Negative	Cure	No	No	No	Tobacco	no	No	no	no	0	not apply	not apply	not apply	not apply	not apply	not apply	not apply	not apply	not apply	not apply	not apply	not apply
RHEZ	2012	62	>=30	Female	Pulmonary		Cure	No	No	No	No	no	No	no	no	0	not apply	not apply	not apply	not apply	not apply	not apply	not apply	not apply	not apply	not apply	not apply	not apply
RHEZ	2013	57	>=30	Female	Pulmonary		Cure	No	No	No	No	no	No	no	no	0	not apply	not apply	not apply	not apply	not apply	not apply	not apply	not apply	not apply	not apply	not apply	not apply
RHEZ	2011	31	>=30	Female	Pulmonary		Cure	No	No	No	No	no	No	no	no	0	not apply	not apply	not apply	not apply	not apply	not apply	not apply	not apply	not apply	not apply	not apply	not apply
RHEZ	2011	52	>=30	Male	Pulmonary	Negative	Cure	No	No	No	No	alcohol	No	no	no	0	not apply	not apply	not apply	not apply	not apply	not apply	not apply	not apply	not apply	not apply	not apply	not apply
RHEZ	2014	54	>=30	Male	Pulmonary	Negative	Cure	No	No	No	No	no	No	no	no	0	not apply	not apply	not apply	not apply	not apply	not apply	not apply	not apply	not apply	not apply	not apply	not apply
RHEZ	2013	44	>=30	Female	Pulmonary		loss follow up	No	No	No	No	no	No	no	no	0	not apply	not apply	not apply	not apply	not apply	not apply	not apply	not apply	not apply	not apply	not apply	not apply
RHEZ	2010	55	>=30	Male	Pulmonary	Negative	Cure	No	No	No	Tobacco	no	No	no	no	0	not apply	not apply	not apply	not apply	not apply	not apply	not apply	not apply	not apply	not apply	not apply	not apply
RHEZ	2013	51	>=30	Male	Pulmonary	Negative	Cure	No	No	No	Tobacco	no	No	no	no	0	not apply	not apply	not apply	not apply	not apply	not apply	not apply	not apply	not apply	not apply	not apply	not apply
RHEZ	2013	35	>=30	Male	Pulmonary	Negative	Cure	No	No	No	Tobacco	alcohol	No	no	no	0	not apply	not apply	not apply	not apply	not apply	not apply	not apply	not apply	not apply	not apply	not apply	not apply
RHEZ	2011	40	>=30	Male	Pulmonary	Negative	Cure	No	No	No	No	no	No	no	no	0	not apply	not apply	not apply	not apply	not apply	not apply	not apply	not apply	not apply	not apply	not apply	not apply
RHEZ	2010	31	>=30	Male	Pulmonary	Negative	Cure	No	No	No	Tobacco	alcohol	No	no	no	0	not apply	not apply	not apply	not apply	not apply	not apply	not apply	not apply	not apply	not apply	not apply	not apply
RHEZ	2011	51	>=30	Male	Pulmonary		Cure	No	Diabetes	No	Tobacco	alcohol	No	no	no	0	not apply	not apply	not apply	not apply	not apply	not apply	not apply	not apply	not apply	not apply	not apply	not apply
RHEZ	2014	48	>=30	Female	Pulmonary		Cure	No	No	No	No	no	No	no	no	0	not apply	not apply	not apply	not apply	not apply	not apply	not apply	not apply	not apply	not apply	not apply	not apply
RHEZ	2012	32	>=30	Female	Pulmonary	Negative	Cure	No	No	No	No	no	No	no	no	0	not apply	not apply	not apply	not apply	not apply	not apply	not apply	not apply	not apply	not apply	not apply	not apply
RHEZ	2014	64	>=30	Male	Pulmonary	Negative	Cure	No	No	No	Tobacco	no	No	no	no	0	not apply	not apply	not apply	not apply	not apply	not apply	not apply	not apply	not apply	not apply	not apply	not apply
RHEZ	2013	47	>=30	Male	Pulmonary	Negative	Cure	No	No	No	Tobacco	alcohol	No	no	no	0	not apply	not apply	not apply	not apply	not apply	not apply	not apply	not apply	not apply	not apply	not apply	not apply
RHEZ	2011	37	>=30	Female	Extrapulmonary		Cure	No	No	No	No	no	No	no	no	0	not apply	not apply	not apply	not apply	not apply	not apply	not apply	not apply	not apply	not apply	not apply	not apply
RHEZ	2012	49	>=30	Male	Pulmonary	Negative	Cure	No	Diabetes	No	Tobacco	no	No	no	no	0	not apply	not apply	not apply	not apply	not apply	not apply	not apply	not apply	not apply	not apply	not apply	not apply
RHEZ	2014	30	>=30	Female	Pulmonary	Negative	Cure	No	No	No	No	alcohol	yes	no	no	0	not apply	not apply	not apply	not apply	not apply	not apply	not apply	not apply	not apply	not apply	not apply	not apply
RHEZ	2014	55	>=30	Female	Pulmonary		Cure	No	No	No	Tobacco	alcohol	No	no	no	0	not apply	not apply	not apply	not apply	not apply	not apply	not apply	not apply	not apply	not apply	not apply	not apply
RHEZ	2014	61	>=30	Male	Pulmonary	Negative	Cure	No	No	No	No	no	No	no	no	0	not apply	not apply	not apply	not apply	not apply	not apply	not apply	not apply	not apply	not apply	not apply	not apply
RHEZ	2010	30	>=30	Female	Pulmonary	Negative	Cure	No	No	No	No	no	No	no	no	0	not apply	not apply	not apply	not apply	not apply	not apply	not apply	not apply	not apply	not apply	not apply	not apply
RHEZ	2013	50	>=30	Male	Pulmonary _ Pleural	Negative	Cure	No	No	No	No	no	No	no	no	0	not apply	not apply	not apply	not apply	not apply	not apply	not apply	not apply	not apply	not apply	not apply	not apply
RHEZ	2011	31	>=30	Male	Pulmonary		MDR	MDR	No	No	No	no	No	no	no	0	not apply	not apply	not apply	not apply	not apply	not apply	not apply	not apply	not apply	not apply	not apply	not apply
RHEZ	2010	35	>=30	Female	Pulmonary	Negative	Cure	No	No	No	No	no	No	no	no	0	not apply	not apply	not apply	not apply	not apply	not apply	not apply	not apply	not apply	not apply	not apply	not apply
RHEZ	2014	49	>=30	Female	Pulmonary		Cure	No	No	No	No	no	No	no	no	0	not apply	not apply	not apply	not apply	not apply	not apply	not apply	not apply	not apply	not apply	not apply	not apply
RHEZ	2013	33	>=30	Male	Pulmonary	Negative	Cure	No	No	No	No	no	No	no	no	0	not apply	not apply	not apply	not apply	not apply	not apply	not apply	not apply	not apply	not apply	not apply	not apply
RHEZ	2011	34	>=30	Female	Extrapulmonary		Cure	No	No	No	No	alcohol	No	no	no	0	not apply	not apply	not apply	not apply	not apply	not apply	not apply	not apply	not apply	not apply	not apply	not apply
RHEZ	2011	56	>=30	Female	Pulmonary	Negative	Cure	No	No	No	No	no	No	no	no	0	not apply	not apply	not apply	not apply	not apply	not apply	not apply	not apply	not apply	not apply	not apply	not apply
RHEZ	2014	47	>=30	Male	Pulmonary		Cure	No	No	No	No	no	No	no	no	0	not apply	not apply	not apply	not apply	not apply	not apply	not apply	not apply	not apply	not apply	not apply	not apply
RHEZ	2010	52	>=30	Male	Pulmonary	Negative	Cure	No	No	No	No	alcohol	No	no	no	0	not apply	not apply	not apply	not apply	not apply	not apply	not apply	not apply	not apply	not apply	not apply	not apply
RHEZ	2012	42	>=30	Male	Pulmonary		loss follow up	No	No	No	Tobacco	no	No	no	no	0	not apply	not apply	not apply	not apply	not apply	not apply	not apply	not apply	not apply	not apply	not apply	not apply
RHEZ	2013	33	>=30	Male	Pulmonary	Negative	Cure	No	No	No	Tobacco	alcohol	No	no	no	0	not apply	not apply	not apply	not apply	not apply	not apply	not apply	not apply	not apply	not apply	not apply	not apply
RHEZ	2013	32	>=30	Female	Pulmonary		Cure	No	No	No	No	no	No	no	no	0	not apply	not apply	not apply	not apply	not apply	not apply	not apply	not apply	not apply	not apply	not apply	not apply
RHEZ	2012	50	>=30	Male	Pulmonary	+	Cure	No	No	No	No	no	No	no	no	0	not apply	not apply	not apply	not apply	not apply	not apply	not apply	not apply	not apply	not apply	not apply	not apply
RHEZ	2014	45	>=30	Male	Pulmonary	Negative	Cure	No	No	No	No	no	No	no	no	0	not apply	not apply	not apply	not apply	not apply	not apply	not apply	not apply	not apply	not apply	not apply	not apply
RHEZ	2012	40	>=30	Female	Pulmonary _ Pleural		MDR	MDR	No	No	No	no	No	no	no	0	not apply	not apply	not apply	not apply	not apply	not apply	not apply	not apply	not apply	not apply	not apply	not apply
RHEZ	2011	47	>=30	Male	Pulmonary	Negative	Cure	No	No	No	No	alcohol	No	no	no	0	not apply	not apply	not apply	not apply	not apply	not apply	not apply	not apply	not apply	not apply	not apply	not apply
RHEZ	2014	41	>=30	Female	Pulmonary		MDR	MDR	No	No	Tobacco	alcohol	No	no	no	0	not apply	not apply	not apply	not apply	not apply	not apply	not apply	not apply	not apply	not apply	not apply	not apply
RHEZ	2011	39	>=30	Female	Pulmonary	Negative	Cure	No	No	No	No	no	No	no	no	0	not apply	not apply	not apply	not apply	not apply	not apply	not apply	not apply	not apply	not apply	not apply	not apply
RHEZ	2013	36	>=30	Female	Pulmonary	Negative	Cure	No	No	No	No	no	No	no	no	0	not apply	not apply	not apply	not apply	not apply	not apply	not apply	not apply	not apply	not apply	not apply	not apply
RHEZ	2014	64	>=30	Male	Pulmonary	Negative	MDR	MDR	No	No	No	no	No	no	no	0	not apply	not apply	not apply	not apply	not apply	not apply	not apply	not apply	not apply	not apply	not apply	not apply
RHEZ	2013	43	>=30	Male	Pulmonary	Negative	Cure	No	No	No	No	no	No	no	no	0	not apply	not apply	not apply	not apply	not apply	not apply	not apply	not apply	not apply	not apply	not apply	not apply
RHEZ	2014	57	>=30	Male	Pulmonary		Cure	No	No	No	Tobacco	no	No	no	no	0	not apply	not apply	not apply	not apply	not apply	not apply	not apply	not apply	not apply	not apply	not apply	not apply
RHEZ	2010	52	>=30	Male	Pulmonary		Cure	No	No	No	Tobacco	no	No	no	no	0	not apply	not apply	not apply	not apply	not apply	not apply	not apply	not apply	not apply	not apply	not apply	not apply
RHEZ	2013	46	>=30	Male	Pulmonary	Negative	Cure	No	No	No	Tobacco	alcohol	No	no	no	0	not apply	not apply	not apply	not apply	not apply	not apply	not apply	not apply	not apply	not apply	not apply	not apply
RHEZ	2013	53	>=30	Male	Pulmonary	Negative	Cure	No	No	No	No	no	No	no	no	0	not apply	not apply	not apply	not apply	not apply	not apply	not apply	not apply	not apply	not apply	not apply	not apply
RHEZ	2011	57	>=30	Male	Pulmonary	Negative	Cure	No	Diabetes	No	Tobacco	no	No	yes	no	0	not apply	not apply	not apply	not apply	not apply	not apply	not apply	not apply	not apply	not apply	not apply	not apply
RHEZ	2014	53	>=30	Male	Pulmonary		Cure	No	No	No	No	no	No	no	no	0	not apply	not apply	not apply	not apply	not apply	not apply	not apply	not apply	not apply	not apply	not apply	not apply
RHEZ	2014	59	>=30	Male	Pulmonary	+	Cure	No	No	No	No	no	No	no	no	0	not apply	not apply	not apply	not apply	not apply	not apply	not apply	not apply	not apply	not apply	not apply	not apply
RHEZ	2013	50	>=30	Male	Pulmonary		Cure	No	No	No	Tobacco	no	No	no	no	0	not apply	not apply	not apply	not apply	not apply	not apply	not apply	not apply	not apply	not apply	not apply	not apply
RHEZ	2014	63	>=30	Male	Pulmonary		Cure	No	No	No	No	no	No	no	no	0	not apply	not apply	not apply	not apply	not apply	not apply	not apply	not apply	not apply	not apply	not apply	not apply
RHEZ	2013	63	>=30	Male	Pulmonary		death	No	No	No	Tobacco	no	No	no	no	0	not apply	not apply	not apply	not apply	not apply	not apply	not apply	not apply	not apply	not apply	not apply	not apply
RHEZ	2012	34	>=30	Male	Pulmonary	+	loss follow up	No	No	No	Tobacco	no	yes	no	no	0	not apply	not apply	not apply	not apply	not apply	not apply	not apply	not apply	not apply	not apply	not apply	not apply
RHEZ	2014	59	>=30	Male	Pulmonary	Negative	MDR	MDR	No	No	No	no	No	no	no	0	not apply	not apply	not apply	not apply	not apply	not apply	not apply	not apply	not apply	not apply	not apply	not apply
RHEZ	2014	62	>=30	Male	Extrapulmonary		Cure	No	No	No	No	no	No	no	no	0	not apply	not apply	not apply	not apply	not apply	not apply	not apply	not apply	not apply	not apply	not apply	not apply
RHEZ	2014	40	>=30	Male	Pulmonary		Cure	No	No	No	No	no	No	no	no	0	not apply	not apply	not apply	not apply	not apply	not apply	not apply	not apply	not apply	not apply	not apply	not apply
RHEZ	2013	36	>=30	Female	Pulmonary	Negative	Cure	No	No	No	No	no	No	no	no	0	not apply	not apply	not apply	not apply	not apply	not apply	not apply	not apply	not apply	not apply	not apply	not apply
RHEZ	2014	52	>=30	Male	Pulmonary		Cure	No	No	No	No	alcohol	No	no	no	0	not apply	not apply	not apply	not apply	not apply	not apply	not apply	not apply	not apply	not apply	not apply	not apply
RHEZ	2012	64	>=30	Male	Extrapulmonary		Cure	No	No	No	No	no	No	no	no	0	not apply	not apply	not apply	not apply	not apply	not apply	not apply	not apply	not apply	not apply	not apply	not apply
RHEZ	2012	32	>=30	Female	Pulmonary		Cure	No	No	No	No	no	No	no	no	0	not apply	not apply	not apply	not apply	not apply	not apply	not apply	not apply	not apply	not apply	not apply	not apply
RHEZ	2014	35	>=30	Female	Pulmonary	Negative	Cure	No	No	No	No	no	No	no	no	0	not apply	not apply	not apply	not apply	not apply	not apply	not apply	not apply	not apply	not apply	not apply	not apply
RHEZ	2014	30	>=30	Male	Pulmonary	Negative	Cure	No	No	No	No	no	No	no	no	0	not apply	not apply	not apply	not apply	not apply	not apply	not apply	not apply	not apply	not apply	not apply	not apply
RHEZ	2014	34	>=30	Male	Pulmonary	Negative	Cure	No	No	No	No	no	No	no	no	0	not apply	not apply	not apply	not apply	not apply	not apply	not apply	not apply	not apply	not apply	not apply	not apply
RHEZ	2011	44	>=30	Female	Pulmonary	Negative	Cure	No	No	No	No	no	No	no	no	0	not apply	not apply	not apply	not apply	not apply	not apply	not apply	not apply	not apply	not apply	not apply	not apply
RHEZ	2013	32	>=30	Female	Pulmonary	Negative	loss follow up	No	No	No	No	no	No	no	no	0	not apply	not apply	not apply	not apply	not apply	not apply	not apply	not apply	not apply	not apply	not apply	not apply
RHEZ	2013	49	>=30	Female	Extrapulmonary		Cure	No	No	No	No	no	No	no	no	0	not apply	not apply	not apply	not apply	not apply	not apply	not apply	not apply	not apply	not apply	not apply	not apply
RHEZ	2010	52	>=30	Female	Extrapulmonary		Cure	No	No	No	Tobacco	no	No	no	no	0	not apply	not apply	not apply	not apply	not apply	not apply	not apply	not apply	not apply	not apply	not apply	not apply
RHEZ	2011	59	>=30	Female	Pulmonary	Negative	Cure	No	Diabetes	No	No	alcohol	No	no	no	0	not apply	not apply	not apply	not apply	not apply	not apply	not apply	not apply	not apply	not apply	not apply	not apply
RHEZ	2013	54	>=30	Female	Pulmonary		Cure	No	No	No	No	no	No	no	no	0	not apply	not apply	not apply	not apply	not apply	not apply	not apply	not apply	not apply	not apply	not apply	not apply
RHEZ	2011	42	>=30	Female	Pulmonary	+	Cure	No	No	No	No	alcohol	No	no	no	0	not apply	not apply	not apply	not apply	not apply	not apply	not apply	not apply	not apply	not apply	not apply	not apply
RHEZ	2013	44	>=30	Female	Pulmonary	Negative	Cure	No	No	No	No	no	No	no	no	0	not apply	not apply	not apply	not apply	not apply	not apply	not apply	not apply	not apply	not apply	not apply	not apply
RHEZ	2014	34	>=30	Male	Pulmonary	Negative	Cure	No	No	No	No	no	No	no	no	0	not apply	not apply	not apply	not apply	not apply	not apply	not apply	not apply	not apply	not apply	not apply	not apply
RHEZ	2012	52	>=30	Male	Extrapulmonary		death	No	No	No	No	no	No	no	no	0	not apply	not apply	not apply	not apply	not apply	not apply	not apply	not apply	not apply	not apply	not apply	not apply
RHEZ	2014	42	>=30	Male	Pulmonary	Negative	Cure	No	No	No	No	no	No	no	no	0	not apply	not apply	not apply	not apply	not apply	not apply	not apply	not apply	not apply	not apply	not apply	not apply
RHEZ	2014	53	>=30	Male	Pulmonary		Cure	No	No	No	No	no	No	no	no	0	not apply	not apply	not apply	not apply	not apply	not apply	not apply	not apply	not apply	not apply	not apply	not apply
RHEZ	2012	56	>=30	Male	Pulmonary	Negative	Cure	No	No	No	No	no	No	no	no	0	not apply	not apply	not apply	not apply	not apply	not apply	not apply	not apply	not apply	not apply	not apply	not apply
RHEZ	2013	31	>=30	Male	Pulmonary	Negative	Cure	No	No	No	Tobacco	no	No	no	no	0	not apply	not apply	not apply	not apply	not apply	not apply	not apply	not apply	not apply	not apply	not apply	not apply
RHEZ	2011	33	>=30	Male	Pulmonary	Negative	Cure	No	No	No	Tobacco	alcohol	yes	no	no	0	not apply	not apply	not apply	not apply	not apply	not apply	not apply	not apply	not apply	not apply	not apply	not apply
RHEZ	2013	42	>=30	Male	Pulmonary	Negative	Cure	No	No	No	Tobacco	no	No	no	no	0	not apply	not apply	not apply	not apply	not apply	not apply	not apply	not apply	not apply	not apply	not apply	not apply
RHEZ	2013	55	>=30	Female	Pulmonary	Negative	Cure	No	No	No	Tobacco	alcohol	No	no	no	0	not apply	not apply	not apply	not apply	not apply	not apply	not apply	not apply	not apply	not apply	not apply	not apply
RHEZ	2014	48	>=30	Male	Pulmonary	Negative	Cure	No	No	No	No	no	No	no	no	0	not apply	not apply	not apply	not apply	not apply	not apply	not apply	not apply	not apply	not apply	not apply	not apply
RHEZ	2011	53	>=30	Male	Pulmonary		Cure	No	No	No	Tobacco	alcohol	No	no	no	0	not apply	not apply	not apply	not apply	not apply	not apply	not apply	not apply	not apply	not apply	not apply	not apply
RHEZ	2014	56	>=30	Male	Pulmonary		Cure	No	No	No	No	no	No	no	no	0	not apply	not apply	not apply	not apply	not apply	not apply	not apply	not apply	not apply	not apply	not apply	not apply
RHEZ	2011	62	>=30	Male	Pulmonary	Negative	MDR	MDR	No	No	Tobacco	alcohol	No	no	no	0	not apply	not apply	not apply	not apply	not apply	not apply	not apply	not apply	not apply	not apply	not apply	not apply
RHEZ	2014	36	>=30	Male	Pulmonary		MDR	MDR	No	No	Tobacco	no	No	no	no	0	not apply	not apply	not apply	not apply	not apply	not apply	not apply	not apply	not apply	not apply	not apply	not apply
RHEZ	2013	31	>=30	Female	Pulmonary		Cure	No	No	No	No	no	No	no	no	0	not apply	not apply	not apply	not apply	not apply	not apply	not apply	not apply	not apply	not apply	not apply	not apply
RHEZ	2013	45	>=30	Female	Pulmonary	Negative	Cure	No	No	No	No	no	No	no	no	0	not apply	not apply	not apply	not apply	not apply	not apply	not apply	not apply	not apply	not apply	not apply	not apply
RHEZ	2011	42	>=30	Female	Pulmonary	Negative	Cure	No	No	No	Tobacco	no	No	yes	no	0	not apply	not apply	not apply	not apply	not apply	not apply	not apply	not apply	not apply	not apply	not apply	not apply
RHEZ	2014	37	>=30	Male	Pulmonary	Negative	Cure	No	No	No	No	no	No	no	no	0	not apply	not apply	not apply	not apply	not apply	not apply	not apply	not apply	not apply	not apply	not apply	not apply
RHEZ	2014	38	>=30	Male	Pulmonary	Negative	Cure	No	No	No	No	no	No	no	no	0	not apply	not apply	not apply	not apply	not apply	not apply	not apply	not apply	not apply	not apply	not apply	not apply
RHEZ	2013	30	>=30	Male	Pulmonary	Negative	Cure	No	No	No	No	no	No	no	no	0	not apply	not apply	not apply	not apply	not apply	not apply	not apply	not apply	not apply	not apply	not apply	not apply
RHEZ	2012	38	>=30	Female	Pulmonary	Negative	Cure	No	No	No	Tobacco	no	No	no	no	0	not apply	not apply	not apply	not apply	not apply	not apply	not apply	not apply	not apply	not apply	not apply	not apply
RHEZ	2012	43	>=30	Female	Pulmonary	Negative	Cure	No	No	No	No	no	No	yes	no	0	not apply	not apply	not apply	not apply	not apply	not apply	not apply	not apply	not apply	not apply	not apply	not apply
RHEZ	2012	53	>=30	Female	Pulmonary	Negative	Cure	No	No	No	No	no	No	no	no	0	not apply	not apply	not apply	not apply	not apply	not apply	not apply	not apply	not apply	not apply	not apply	not apply
RHEZ	2011	62	>=30	Female	Pulmonary	++	Cure	No	No	No	Tobacco	no	No	no	no	0	not apply	not apply	not apply	not apply	not apply	not apply	not apply	not apply	not apply	not apply	not apply	not apply
RHEZ	2011	54	>=30	Female	Pulmonary	Negative	Cure	No	No	No	Tobacco	no	No	no	no	0	not apply	not apply	not apply	not apply	not apply	not apply	not apply	not apply	not apply	not apply	not apply	not apply
RHEZ	2014	35	>=30	Male	Pulmonary	Negative	Cure	No	No	No	Tobacco	alcohol	No	no	no	0	not apply	not apply	not apply	not apply	not apply	not apply	not apply	not apply	not apply	not apply	not apply	not apply
RHEZ	2010	56	>=30	Male	Pulmonary		Cure	No	No	No	No	no	No	no	no	0	not apply	not apply	not apply	not apply	not apply	not apply	not apply	not apply	not apply	not apply	not apply	not apply
RHEZ	2011	42	>=30	Female	Pulmonary	Negative	Cure	No	No	No	No	no	No	no	no	0	not apply	not apply	not apply	not apply	not apply	not apply	not apply	not apply	not apply	not apply	not apply	not apply
RHEZ	2014	55	>=30	Female	Pulmonary	Negative	Cure	No	No	No	No	no	No	no	no	0	not apply	not apply	not apply	not apply	not apply	not apply	not apply	not apply	not apply	not apply	not apply	not apply
RHEZ	2014	33	>=30	Female	Pulmonary	Negative	Cure	No	No	No	No	no	No	no	no	0	not apply	not apply	not apply	not apply	not apply	not apply	not apply	not apply	not apply	not apply	not apply	not apply
RHEZ	2014	50	>=30	Female	Pulmonary		Cure	No	No	No	No	no	No	no	no	0	not apply	not apply	not apply	not apply	not apply	not apply	not apply	not apply	not apply	not apply	not apply	not apply
RHEZ	2014	55	>=30	Male	Pulmonary	Negative	Cure	No	No	No	No	no	No	no	no	0	not apply	not apply	not apply	not apply	not apply	not apply	not apply	not apply	not apply	not apply	not apply	not apply
RHEZ	2014	60	>=30	Female	Pulmonary	Negative	Cure	No	No	No	No	no	No	no	no	0	not apply	not apply	not apply	not apply	not apply	not apply	not apply	not apply	not apply	not apply	not apply	not apply
RHEZ	2013	55	>=30	Male	Pulmonary		Cure	No	No	No	No	no	No	no	no	0	not apply	not apply	not apply	not apply	not apply	not apply	not apply	not apply	not apply	not apply	not apply	not apply
RHEZ	2014	31	>=30	Female	Pulmonary	Negative	Cure	No	No	No	No	no	No	no	no	0	not apply	not apply	not apply	not apply	not apply	not apply	not apply	not apply	not apply	not apply	not apply	not apply
RHEZ	2012	48	>=30	Female	Pulmonary		Cure	No	Diabetes	No	No	no	No	no	no	0	not apply	not apply	not apply	not apply	not apply	not apply	not apply	not apply	not apply	not apply	not apply	not apply
RHEZ	2014	44	>=30	Female	Pulmonary		Cure	No	No	No	No	no	No	no	no	0	not apply	not apply	not apply	not apply	not apply	not apply	not apply	not apply	not apply	not apply	not apply	not apply
RHEZ	2014	35	>=30	Male	Pulmonary		Cure	No	No	No	No	no	No	no	no	0	not apply	not apply	not apply	not apply	not apply	not apply	not apply	not apply	not apply	not apply	not apply	not apply
RHEZ	2010	35	>=30	Female	Pulmonary	Negative	Cure	No	No	No	No	alcohol	No	no	no	0	not apply	not apply	not apply	not apply	not apply	not apply	not apply	not apply	not apply	not apply	not apply	not apply
RHEZ	2014	60	>=30	Male	Pulmonary	Negative	Cure	No	No	No	Tobacco	alcohol	No	yes	no	0	not apply	not apply	not apply	not apply	not apply	not apply	not apply	not apply	not apply	not apply	not apply	not apply
RHEZ	2014	35	>=30	Female	Pulmonary		Cure	No	No	No	No	alcohol	No	no	no	0	not apply	not apply	not apply	not apply	not apply	not apply	not apply	not apply	not apply	not apply	not apply	not apply
RHEZ	2012	59	>=30	Male	Pulmonary		Cure	No	No	No	No	no	No	no	no	0	not apply	not apply	not apply	not apply	not apply	not apply	not apply	not apply	not apply	not apply	not apply	not apply
RHEZ	2012	33	>=30	Male	Pulmonary	Negative	Cure	No	No	No	No	no	No	no	no	0	not apply	not apply	not apply	not apply	not apply	not apply	not apply	not apply	not apply	not apply	not apply	not apply
RHEZ	2012	54	>=30	Male	Pulmonary	Negative	Cure	No	Diabetes	No	Tobacco	no	No	no	no	0	not apply	not apply	not apply	not apply	not apply	not apply	not apply	not apply	not apply	not apply	not apply	not apply
RHEZ	2012	32	>=30	Male	Pulmonary		Cure	No	No	No	No	no	No	no	no	0	not apply	not apply	not apply	not apply	not apply	not apply	not apply	not apply	not apply	not apply	not apply	not apply
RHEZ	2011	31	>=30	Male	Pulmonary	Negative	Cure	No	No	No	No	no	No	no	no	0	not apply	not apply	not apply	not apply	not apply	not apply	not apply	not apply	not apply	not apply	not apply	not apply
RHEZ	2014	54	>=30	Male	Pulmonary	Negative	Cure	No	No	No	No	alcohol	No	no	no	0	not apply	not apply	not apply	not apply	not apply	not apply	not apply	not apply	not apply	not apply	not apply	not apply
RHEZ	2012	46	>=30	Male	Pulmonary	Negative	Cure	No	Diabetes	No	Tobacco	alcohol	No	yes	no	0	not apply	not apply	not apply	not apply	not apply	not apply	not apply	not apply	not apply	not apply	not apply	not apply
RHEZ	2010	64	>=30	Male	Pulmonary	Negative	Cure	No	No	No	Tobacco	alcohol	No	no	no	0	not apply	not apply	not apply	not apply	not apply	not apply	not apply	not apply	not apply	not apply	not apply	not apply
RHEZ	2014	50	>=30	Female	Pulmonary		Cure	No	No	No	No	no	No	no	no	0	not apply	not apply	not apply	not apply	not apply	not apply	not apply	not apply	not apply	not apply	not apply	not apply
RHEZ	2014	58	>=30	Male	Pulmonary	Negative	Cure	No	No	No	No	no	No	no	no	0	not apply	not apply	not apply	not apply	not apply	not apply	not apply	not apply	not apply	not apply	not apply	not apply
RHEZ	2011	37	>=30	Male	Pulmonary	+++	Cure	No	Diabetes	No	No	no	No	no	no	0	not apply	not apply	not apply	not apply	not apply	not apply	not apply	not apply	not apply	not apply	not apply	not apply
RHEZ	2011	32	>=30	Male	Pulmonary		Cure	No	No	No	No	no	No	no	no	0	not apply	not apply	not apply	not apply	not apply	not apply	not apply	not apply	not apply	not apply	not apply	not apply
RHEZ	2014	60	>=30	Female	Pulmonary	Negative	Cure	No	Diabetes	No	No	no	No	no	no	0	not apply	not apply	not apply	not apply	not apply	not apply	not apply	not apply	not apply	not apply	not apply	not apply
RHEZ	2012	51	>=30	Male	Pulmonary	Negative	Cure	No	No	No	No	no	No	no	no	0	not apply	not apply	not apply	not apply	not apply	not apply	not apply	not apply	not apply	not apply	not apply	not apply
RHEZ	2013	30	>=30	Male	Pulmonary	Negative	Cure	No	No	No	No	no	No	no	no	0	not apply	not apply	not apply	not apply	not apply	not apply	not apply	not apply	not apply	not apply	not apply	not apply
RHEZ	2011	57	>=30	Male	Pulmonary	Negative	Cure	No	No	No	No	no	No	no	no	0	not apply	not apply	not apply	not apply	not apply	not apply	not apply	not apply	not apply	not apply	not apply	not apply
RHEZ	2012	53	>=30	Female	Pulmonary		Cure	No	Diabetes	No	No	no	No	no	no	0	not apply	not apply	not apply	not apply	not apply	not apply	not apply	not apply	not apply	not apply	not apply	not apply
RHEZ	2011	50	>=30	Female	Pulmonary		Cure	No	Diabetes	No	Tobacco	no	No	yes	no	0	not apply	not apply	not apply	not apply	not apply	not apply	not apply	not apply	not apply	not apply	not apply	not apply
RHEZ	2012	44	>=30	Male	Pulmonary	Negative	Cure	No	No	No	Tobacco	alcohol	No	no	no	0	not apply	not apply	not apply	not apply	not apply	not apply	not apply	not apply	not apply	not apply	not apply	not apply
RHEZ	2014	61	>=30	Male	Pulmonary	++	Cure	No	No	No	No	no	No	no	no	0	not apply	not apply	not apply	not apply	not apply	not apply	not apply	not apply	not apply	not apply	not apply	not apply
RHEZ	2012	31	>=30	Female	Pulmonary	Negative	Cure	No	No	No	No	no	No	no	no	0	not apply	not apply	not apply	not apply	not apply	not apply	not apply	not apply	not apply	not apply	not apply	not apply
RHEZ	2010	60	>=30	Male	Pulmonary		Cure	No	No	No	Tobacco	no	No	no	no	0	not apply	not apply	not apply	not apply	not apply	not apply	not apply	not apply	not apply	not apply	not apply	not apply
RHEZ	2013	32	>=30	Female	Pulmonary	Negative	Cure	No	No	No	No	no	No	no	no	0	not apply	not apply	not apply	not apply	not apply	not apply	not apply	not apply	not apply	not apply	not apply	not apply
RHEZ	2010	42	>=30	Female	Pulmonary	Negative	Cure	No	No	No	No	no	No	no	no	0	not apply	not apply	not apply	not apply	not apply	not apply	not apply	not apply	not apply	not apply	not apply	not apply
RHEZ	2010	41	>=30	Female	Pulmonary		Cure	No	No	No	No	no	No	no	no	0	not apply	not apply	not apply	not apply	not apply	not apply	not apply	not apply	not apply	not apply	not apply	not apply
RHEZ	2014	50	>=30	Female	Pulmonary	Negative	Cure	No	No	No	No	no	No	no	no	0	not apply	not apply	not apply	not apply	not apply	not apply	not apply	not apply	not apply	not apply	not apply	not apply
RHEZ	2011	38	>=30	Female	Extrapulmonary		Cure	No	No	No	No	no	No	no	no	0	not apply	not apply	not apply	not apply	not apply	not apply	not apply	not apply	not apply	not apply	not apply	not apply
RHEZ	2012	36	>=30	Male	Extrapulmonary		Cure	No	No	No	No	no	No	no	no	0	not apply	not apply	not apply	not apply	not apply	not apply	not apply	not apply	not apply	not apply	not apply	not apply
RHEZ	2010	55	>=30	Female	Pulmonary		Cure	No	No	No	Tobacco	no	No	no	no	0	not apply	not apply	not apply	not apply	not apply	not apply	not apply	not apply	not apply	not apply	not apply	not apply
RHEZ	2011	59	>=30	Female	Pulmonary		death	No	Diabetes	No	Tobacco	no	No	no	no	0	not apply	not apply	not apply	not apply	not apply	not apply	not apply	not apply	not apply	not apply	not apply	not apply
RHEZ	2014	43	>=30	Female	Pulmonary		Cure	No	No	No	No	no	No	no	no	0	not apply	not apply	not apply	not apply	not apply	not apply	not apply	not apply	not apply	not apply	not apply	not apply
RHEZ	2013	64	>=30	Male	Extrapulmonary		Cure	No	No	No	No	no	No	no	no	0	not apply	not apply	not apply	not apply	not apply	not apply	not apply	not apply	not apply	not apply	not apply	not apply
RHEZ	2013	31	>=30	Male	Pulmonary	+	Cure	No	No	No	Tobacco	no	No	no	no	0	not apply	not apply	not apply	not apply	not apply	not apply	not apply	not apply	not apply	not apply	not apply	not apply
RHEZ	2013	53	>=30	Female	Pulmonary	Negative	Cure	No	No	No	Tobacco	alcohol	No	no	no	0	not apply	not apply	not apply	not apply	not apply	not apply	not apply	not apply	not apply	not apply	not apply	not apply
RHEZ	2012	44	>=30	Female	Pulmonary	Negative	Cure	No	No	No	No	no	No	no	no	0	not apply	not apply	not apply	not apply	not apply	not apply	not apply	not apply	not apply	not apply	not apply	not apply
RHZ	2009	55	>=30	Male	Pulmonary		Cure	No	Diabetes	Hipertensão	Tobacco	no	No	no	no	0	not apply	not apply	not apply	not apply	not apply	not apply	not apply	not apply	not apply	not apply	not apply	not apply
RHZ	2009	37	>=30	Male	Pulmonary	Negative	Cure	No	Diabetes	No	Tobacco	no	No	no	no	0	not apply	not apply	not apply	not apply	not apply	not apply	not apply	not apply	not apply	not apply	not apply	not apply
RHZ	2007	52	>=30	Male	Pulmonary		death	No	No	No	Tobacco	no	No	no	no	0	not apply	not apply	not apply	not apply	not apply	not apply	not apply	not apply	not apply	not apply	not apply	not apply
RHZ	2007	53	>=30	Male	Pulmonary	+	Cure	No	No	No	No	no	No	no	no	0	not apply	not apply	not apply	not apply	not apply	not apply	not apply	not apply	not apply	not apply	not apply	not apply
RHZ	2008	41	>=30	Male	Pulmonary	Negative	Cure	No	No	No	No	no	No	no	no	0	not apply	not apply	not apply	not apply	not apply	not apply	not apply	not apply	not apply	not apply	not apply	not apply
RHZ	2008	30	>=30	Female	Pulmonary		Cure	No	No	No	No	no	No	no	no	0	not apply	not apply	not apply	not apply	not apply	not apply	not apply	not apply	not apply	not apply	not apply	not apply
RHZ	2009	30	>=30	Male	Pulmonary		MDR	MDR	Diabetes	No	Tobacco	no	No	no	no	0	not apply	not apply	not apply	not apply	not apply	not apply	not apply	not apply	not apply	not apply	not apply	not apply
RHZ	2008	31	>=30	Male	Pulmonary	Negative	Cure	No	No	No	No	no	No	no	no	0	not apply	not apply	not apply	not apply	not apply	not apply	not apply	not apply	not apply	not apply	not apply	not apply
RHZ	2008	57	>=30	Male	Pulmonary	Negative	MDR	MDR	No	No	No	no	No	no	no	0	not apply	not apply	not apply	not apply	not apply	not apply	not apply	not apply	not apply	not apply	not apply	not apply
RHZ	2009	38	>=30	Female	Pulmonary		Cure	No	No	No	No	no	No	no	no	0	not apply	not apply	not apply	not apply	not apply	not apply	not apply	not apply	not apply	not apply	not apply	not apply
RHZ	2008	57	>=30	Male	Pulmonary		Cure	No	No	No	No	no	No	no	no	0	not apply	not apply	not apply	not apply	not apply	not apply	not apply	not apply	not apply	not apply	not apply	not apply
RHZ	2009	51	>=30	Female	Pulmonary	Negative	Cure	No	Diabetes	No	No	no	No	no	no	0	not apply	not apply	not apply	not apply	not apply	not apply	not apply	not apply	not apply	not apply	not apply	not apply
RHZ	2009	40	>=30	Male	Pulmonary	Negative	Cure	No	No	No	No	no	No	no	no	0	not apply	not apply	not apply	not apply	not apply	not apply	not apply	not apply	not apply	not apply	not apply	not apply
RHZ	2009	35	>=30	Male	Pulmonary		Cure	No	Diabetes	No	Tobacco	no	No	no	no	0	not apply	not apply	not apply	not apply	not apply	not apply	not apply	not apply	not apply	not apply	not apply	not apply
RHZ	2009	50	>=30	Male	Pulmonary	Negative	loss follow up	No	Diabetes	No	No	no	No	no	no	0	not apply	not apply	not apply	not apply	not apply	not apply	not apply	not apply	not apply	not apply	not apply	not apply
RHZ	2009	59	>=30	Male	Pulmonary	Negative	Cure	No	Diabetes	No	Tobacco	no	No	no	no	0	not apply	not apply	not apply	not apply	not apply	not apply	not apply	not apply	not apply	not apply	not apply	not apply
RHZ	2008	39	>=30	Male	Pulmonary		MDR	MDR	No	No	No	no	No	no	no	0	not apply	not apply	not apply	not apply	not apply	not apply	not apply	not apply	not apply	not apply	not apply	not apply
RHZ	2009	44	>=30	Male	Pulmonary		death	No	No	No	No	alcohol	No	no	no	0	not apply	not apply	not apply	not apply	not apply	not apply	not apply	not apply	not apply	not apply	not apply	not apply
RHZ	2009	58	>=30	Male	Pulmonary		Cure	No	No	No	Tobacco	alcohol	No	no	no	0	not apply	not apply	not apply	not apply	not apply	not apply	not apply	not apply	not apply	not apply	not apply	not apply
RHZ	2007	38	>=30	Male	Pulmonary	Negative	Cure	No	No	No	No	no	No	no	no	0	not apply	not apply	not apply	not apply	not apply	not apply	not apply	not apply	not apply	not apply	not apply	not apply
RHZ	2007	57	>=30	Male	Pulmonary	Negative	Cure	No	Diabetes	No	Tobacco	no	No	no	no	0	not apply	not apply	not apply	not apply	not apply	not apply	not apply	not apply	not apply	not apply	not apply	not apply
RHZ	2009	62	>=30	Male	Pulmonary	Negative	Cure	No	Diabetes	No	Tobacco	no	No	no	no	0	not apply	not apply	not apply	not apply	not apply	not apply	not apply	not apply	not apply	not apply	not apply	not apply
RHZ	2009	47	>=30	Female	Pulmonary	Negative	loss follow up	No	No	No	No	alcohol	No	no	no	0	not apply	not apply	not apply	not apply	not apply	not apply	not apply	not apply	not apply	not apply	not apply	not apply
RHZ	2007	48	>=30	Male	Pulmonary	Negative	Cure	No	No	No	No	no	No	no	no	0	not apply	not apply	not apply	not apply	not apply	not apply	not apply	not apply	not apply	not apply	not apply	not apply
RHZ	2008	38	>=30	Male	Pulmonary	Negative	Cure	No	No	No	No	no	No	no	no	0	not apply	not apply	not apply	not apply	not apply	not apply	not apply	not apply	not apply	not apply	not apply	not apply
RHZ	2008	36	>=30	Male	Pulmonary		Cure	No	No	No	No	no	No	no	no	0	not apply	not apply	not apply	not apply	not apply	not apply	not apply	not apply	not apply	not apply	not apply	not apply
RHZ	2009	40	>=30	Female	Pulmonary	Negative	Cure	No	No	No	Tobacco	no	No	no	no	0	not apply	not apply	not apply	not apply	not apply	not apply	not apply	not apply	not apply	not apply	not apply	not apply
RHZ	2007	30	>=30	Female	Pulmonary	Negative	Cure	No	No	No	No	no	No	no	no	0	not apply	not apply	not apply	not apply	not apply	not apply	not apply	not apply	not apply	not apply	not apply	not apply
RHZ	2008	35	>=30	Male	Pulmonary		Cure	No	No	No	No	no	No	no	no	0	not apply	not apply	not apply	not apply	not apply	not apply	not apply	not apply	not apply	not apply	not apply	not apply
RHZ	2007	37	>=30	Female	Pulmonary	Negative	Cure	No	No	No	No	no	No	no	no	0	not apply	not apply	not apply	not apply	not apply	not apply	not apply	not apply	not apply	not apply	not apply	not apply
RHZ	2007	56	>=30	Female	Pulmonary	Negative	Cure	No	No	No	No	no	No	no	no	0	not apply	not apply	not apply	not apply	not apply	not apply	not apply	not apply	not apply	not apply	not apply	not apply
RHZ	2008	41	>=30	Male	Pulmonary		MDR	MDR	No	No	Tobacco	alcohol	No	no	no	0	not apply	not apply	not apply	not apply	not apply	not apply	not apply	not apply	not apply	not apply	not apply	not apply
RHZ	2008	30	>=30	Female	Pulmonary	Negative	Cure	No	No	No	No	no	No	no	no	0	not apply	not apply	not apply	not apply	not apply	not apply	not apply	not apply	not apply	not apply	not apply	not apply
RHZ	2008	45	>=30	Male	Pulmonary	Negative	Cure	No	No	No	No	no	No	no	no	0	not apply	not apply	not apply	not apply	not apply	not apply	not apply	not apply	not apply	not apply	not apply	not apply
RHZ	2007	62	>=30	Male	Pulmonary		MDR	MDR	No	No	No	no	No	no	no	0	not apply	not apply	not apply	not apply	not apply	not apply	not apply	not apply	not apply	not apply	not apply	not apply
RHZ	2009	30	>=30	Male	Pulmonary		Cure	No	No	No	No	no	No	no	no	0	not apply	not apply	not apply	not apply	not apply	not apply	not apply	not apply	not apply	not apply	not apply	not apply
RHZ	2008	41	>=30	Male	Pulmonary	Negative	Cure	No	Diabetes	No	No	no	No	no	no	0	not apply	not apply	not apply	not apply	not apply	not apply	not apply	not apply	not apply	not apply	not apply	not apply
RHZ	2009	54	>=30	Male	Pulmonary		death	No	No	No	Tobacco	no	No	no	no	0	not apply	not apply	not apply	not apply	not apply	not apply	not apply	not apply	not apply	not apply	not apply	not apply
RHZ	2009	41	>=30	Male	Pulmonary	Negative	Cure	No	No	No	No	no	No	no	no	0	not apply	not apply	not apply	not apply	not apply	not apply	not apply	not apply	not apply	not apply	not apply	not apply
RHZ	2009	37	>=30	Male	Pulmonary	Negative	Cure	No	No	No	Tobacco	no	No	no	no	0	not apply	not apply	not apply	not apply	not apply	not apply	not apply	not apply	not apply	not apply	not apply	not apply
RHZ	2008	31	>=30	Male	Pulmonary	Negative	Cure	No	No	No	No	no	No	no	no	0	not apply	not apply	not apply	not apply	not apply	not apply	not apply	not apply	not apply	not apply	not apply	not apply
RHZ	2009	33	>=30	Male	Extrapulmonary		Cure	No	No	No	No	no	No	no	no	0	not apply	not apply	not apply	not apply	not apply	not apply	not apply	not apply	not apply	not apply	not apply	not apply
RHZ	2007	62	>=30	Male	Pulmonary		Cure	No	No	No	No	no	No	no	no	0	not apply	not apply	not apply	not apply	not apply	not apply	not apply	not apply	not apply	not apply	not apply	not apply
RHZ	2009	30	>=30	Female	Extrapulmonary		Cure	No	No	No	No	no	No	no	no	0	not apply	not apply	not apply	not apply	not apply	not apply	not apply	not apply	not apply	not apply	not apply	not apply
RHZ	2007	46	>=30	Male	Pulmonary	Negative	death	No	No	No	Tobacco	no	No	no	no	0	not apply	not apply	not apply	not apply	not apply	not apply	not apply	not apply	not apply	not apply	not apply	not apply
RHZ	2009	43	>=30	Male	Pulmonary	Negative	death	No	No	No	Tobacco	no	No	no	no	0	not apply	not apply	not apply	not apply	not apply	not apply	not apply	not apply	not apply	not apply	not apply	not apply
RHZ	2007	50	>=30	Male	Pulmonary	+	Failure	No	Diabetes	No	No	no	No	no	no	0	not apply	not apply	not apply	not apply	not apply	not apply	not apply	not apply	not apply	not apply	not apply	not apply
RHZ	2009	55	>=30	Male	Pulmonary	Negative	Cure	No	No	No	Tobacco	alcohol	No	no	no	0	not apply	not apply	not apply	not apply	not apply	not apply	not apply	not apply	not apply	not apply	not apply	not apply
RHZ	2008	43	>=30	Female	Pulmonary	Negative	Cure	No	No	No	No	no	No	no	no	0	not apply	not apply	not apply	not apply	not apply	not apply	not apply	not apply	not apply	not apply	not apply	not apply
RHZ	2008	41	>=30	Female	Extrapulmonary		Cure	No	No	No	No	no	No	no	no	0	not apply	not apply	not apply	not apply	not apply	not apply	not apply	not apply	not apply	not apply	not apply	not apply
RHZ	2009	33	>=30	Male	Pulmonary		loss follow up	No	Diabetes	No	Tobacco	no	No	no	no	0	not apply	not apply	not apply	not apply	not apply	not apply	not apply	not apply	not apply	not apply	not apply	not apply
RHZ	2008	43	>=30	Male	Pulmonary		loss follow up	No	No	No	No	no	No	no	no	0	not apply	not apply	not apply	not apply	not apply	not apply	not apply	not apply	not apply	not apply	not apply	not apply
RHZ	2009	36	>=30	Male	Pulmonary	Negative	Cure	No	No	No	No	no	No	no	no	0	not apply	not apply	not apply	not apply	not apply	not apply	not apply	not apply	not apply	not apply	not apply	not apply
RHZ	2008	52	>=30	Male	Pulmonary	Negative	Cure	No	No	No	Tobacco	alcohol	No	no	no	0	not apply	not apply	not apply	not apply	not apply	not apply	not apply	not apply	not apply	not apply	not apply	not apply
RHZ	2008	55	>=30	Male	Pulmonary	Negative	Cure	No	No	No	No	no	No	no	no	0	not apply	not apply	not apply	not apply	not apply	not apply	not apply	not apply	not apply	not apply	not apply	not apply
RHZ	2007	34	>=30	Male	Pulmonary	Negative	Cure	No	No	No	No	no	No	no	no	0	not apply	not apply	not apply	not apply	not apply	not apply	not apply	not apply	not apply	not apply	not apply	not apply
RHZ	2009	58	>=30	Female	Pulmonary		MDR	MDR	No	No	Tobacco	no	No	yes	no	0	not apply	not apply	not apply	not apply	not apply	not apply	not apply	not apply	not apply	not apply	not apply	not apply
RHZ	2008	44	>=30	Female	Pulmonary	Negative	Cure	No	No	No	No	no	No	no	no	0	not apply	not apply	not apply	not apply	not apply	not apply	not apply	not apply	not apply	not apply	not apply	not apply
RHZ	2008	47	>=30	Male	Pulmonary		Cure	No	No	No	No	no	No	no	no	0	not apply	not apply	not apply	not apply	not apply	not apply	not apply	not apply	not apply	not apply	not apply	not apply
RHZ	2007	46	>=30	Male	Pulmonary	Negative	Cure	No	No	No	No	no	No	no	no	0	not apply	not apply	not apply	not apply	not apply	not apply	not apply	not apply	not apply	not apply	not apply	not apply
RHZ	2009	51	>=30	Male	Pulmonary	Negative	Cure	No	No	No	Tobacco	alcohol	No	no	no	0	not apply	not apply	not apply	not apply	not apply	not apply	not apply	not apply	not apply	not apply	not apply	not apply
RHZ	2008	35	>=30	Female	Pulmonary	Negative	Cure	No	No	No	No	no	No	no	no	0	not apply	not apply	not apply	not apply	not apply	not apply	not apply	not apply	not apply	not apply	not apply	not apply
RHZ	2008	32	>=30	Male	Pulmonary	Negative	Cure	No	No	No	No	no	No	no	no	0	not apply	not apply	not apply	not apply	not apply	not apply	not apply	not apply	not apply	not apply	not apply	not apply
RHZ	2008	38	>=30	Male	Pulmonary	+	Cure	No	No	No	No	no	No	no	no	0	not apply	not apply	not apply	not apply	not apply	not apply	not apply	not apply	not apply	not apply	not apply	not apply
RHZ	2008	34	>=30	Female	Pulmonary	Negative	Cure	No	No	No	No	no	No	no	no	0	not apply	not apply	not apply	not apply	not apply	not apply	not apply	not apply	not apply	not apply	not apply	not apply
RHZ	2009	42	>=30	Male	Extrapulmonary		Cure	No	No	No	No	no	No	no	no	0	not apply	not apply	not apply	not apply	not apply	not apply	not apply	not apply	not apply	not apply	not apply	not apply
RHZ	2008	56	>=30	Male	Pulmonary		Cure	No	No	No	No	no	No	no	no	0	not apply	not apply	not apply	not apply	not apply	not apply	not apply	not apply	not apply	not apply	not apply	not apply
RHZ	2008	41	>=30	Male	Pulmonary	Negative	Cure	No	No	No	Tobacco	no	No	no	no	0	not apply	not apply	not apply	not apply	not apply	not apply	not apply	not apply	not apply	not apply	not apply	not apply
RHZ	2009	45	>=30	Male	Pulmonary		Cure	No	No	No	Tobacco	alcohol	No	no	no	0	not apply	not apply	not apply	not apply	not apply	not apply	not apply	not apply	not apply	not apply	not apply	not apply
RHZ	2008	31	>=30	Female	Pulmonary	Negative	Cure	No	No	No	No	no	No	no	no	0	not apply	not apply	not apply	not apply	not apply	not apply	not apply	not apply	not apply	not apply	not apply	not apply
RHZ	2009	34	>=30	Female	Pulmonary		Cure	No	No	No	No	no	No	no	no	0	not apply	not apply	not apply	not apply	not apply	not apply	not apply	not apply	not apply	not apply	not apply	not apply
RHZ	2008	31	>=30	Male	Pulmonary	Negative	Cure	No	No	No	No	no	No	no	no	0	not apply	not apply	not apply	not apply	not apply	not apply	not apply	not apply	not apply	not apply	not apply	not apply
RHZ	2008	48	>=30	Male	Pulmonary	+	Cure	No	No	No	No	no	No	no	no	0	not apply	not apply	not apply	not apply	not apply	not apply	not apply	not apply	not apply	not apply	not apply	not apply
RHZ	2007	31	>=30	Male	Pulmonary	Negative	Cure	No	No	No	No	no	No	no	no	0	not apply	not apply	not apply	not apply	not apply	not apply	not apply	not apply	not apply	not apply	not apply	not apply
RHZ	2009	64	>=30	Male	Pulmonary		Cure	No	No	No	Tobacco	alcohol	No	no	no	0	not apply	not apply	not apply	not apply	not apply	not apply	not apply	not apply	not apply	not apply	not apply	not apply
RHZ	2008	33	>=30	Male	Pulmonary	Negative	Cure	No	No	No	No	no	No	no	no	0	not apply	not apply	not apply	not apply	not apply	not apply	not apply	not apply	not apply	not apply	not apply	not apply
RHZ	2007	53	>=30	Female	Pulmonary	Negative	Cure	No	No	No	No	no	No	no	no	0	not apply	not apply	not apply	not apply	not apply	not apply	not apply	not apply	not apply	not apply	not apply	not apply
RHZ	2008	64	>=30	Male	Pulmonary	Negative	Cure	No	No	No	No	no	No	no	no	0	not apply	not apply	not apply	not apply	not apply	not apply	not apply	not apply	not apply	not apply	not apply	not apply
RHZ	2009	40	>=30	Male	Pulmonary	Negative	Cure	No	No	No	No	no	No	no	no	0	not apply	not apply	not apply	not apply	not apply	not apply	not apply	not apply	not apply	not apply	not apply	not apply
RHZ	2009	54	>=30	Male	Pulmonary	Negative	Cure	No	No	No	No	alcohol	No	no	no	0	not apply	not apply	not apply	not apply	not apply	not apply	not apply	not apply	not apply	not apply	not apply	not apply
RHZ	2009	32	>=30	Female	Pulmonary		Cure	No	No	No	No	no	No	no	no	0	not apply	not apply	not apply	not apply	not apply	not apply	not apply	not apply	not apply	not apply	not apply	not apply
RHZ	2009	56	>=30	Male	Extrapulmonary		Cure	No	No	No	No	alcohol	No	no	no	0	not apply	not apply	not apply	not apply	not apply	not apply	not apply	not apply	not apply	not apply	not apply	not apply
RHZ	2008	50	>=30	Male	Pulmonary		Cure	No	No	No	Tobacco	no	No	no	no	0	not apply	not apply	not apply	not apply	not apply	not apply	not apply	not apply	not apply	not apply	not apply	not apply
RHZ	2008	60	>=30	Male	Pulmonary	Negative	Cure	No	No	No	No	no	No	no	no	0	not apply	not apply	not apply	not apply	not apply	not apply	not apply	not apply	not apply	not apply	not apply	not apply
RHZ	2008	44	>=30	Male	Pulmonary		Cure	No	No	No	No	no	No	no	no	0	not apply	not apply	not apply	not apply	not apply	not apply	not apply	not apply	not apply	not apply	not apply	not apply
RHZ	2007	45	>=30	Male	Pulmonary	Negative	Cure	No	Diabetes	No	No	no	No	no	no	0	not apply	not apply	not apply	not apply	not apply	not apply	not apply	not apply	not apply	not apply	not apply	not apply
RHZ	2008	55	>=30	Male	Pulmonary		Cure	No	No	No	No	no	No	no	no	0	not apply	not apply	not apply	not apply	not apply	not apply	not apply	not apply	not apply	not apply	not apply	not apply
RHZ	2009	63	>=30	Male	Pulmonary	Negative	Cure	No	No	No	Tobacco	alcohol	No	no	no	0	not apply	not apply	not apply	not apply	not apply	not apply	not apply	not apply	not apply	not apply	not apply	not apply
RHZ	2008	55	>=30	Male	Pulmonary		Cure	No	No	No	No	no	No	no	no	0	not apply	not apply	not apply	not apply	not apply	not apply	not apply	not apply	not apply	not apply	not apply	not apply
RHZ	2009	59	>=30	Male	Pulmonary		Cure	No	No	No	Tobacco	alcohol	No	no	no	0	not apply	not apply	not apply	not apply	not apply	not apply	not apply	not apply	not apply	not apply	not apply	not apply
RHZ	2007	36	>=30	Male	Pulmonary		MDR	MDR	No	No	No	no	No	no	no	0	not apply	not apply	not apply	not apply	not apply	not apply	not apply	not apply	not apply	not apply	not apply	not apply
RHZ	2007	55	>=30	Male	Pulmonary	Negative	Cure	No	No	No	No	no	No	no	no	0	not apply	not apply	not apply	not apply	not apply	not apply	not apply	not apply	not apply	not apply	not apply	not apply
RHZ	2008	34	>=30	Male	Pulmonary		loss follow up	No	No	No	No	no	No	no	no	0	not apply	not apply	not apply	not apply	not apply	not apply	not apply	not apply	not apply	not apply	not apply	not apply
RHZ	2008	56	>=30	Male	Pulmonary	Negative	Cure	No	No	No	No	no	No	no	no	0	not apply	not apply	not apply	not apply	not apply	not apply	not apply	not apply	not apply	not apply	not apply	not apply
RHZ	2008	59	>=30	Male	Pulmonary		Cure	No	Diabetes	No	No	no	No	no	no	0	not apply	not apply	not apply	not apply	not apply	not apply	not apply	not apply	not apply	not apply	not apply	not apply
RHZ	2007	38	>=30	Male	Pulmonary	Negative	Cure	No	No	No	No	no	No	no	no	0	not apply	not apply	not apply	not apply	not apply	not apply	not apply	not apply	not apply	not apply	not apply	not apply
RHZ	2008	41	>=30	Female	Pulmonary	Negative	Cure	No	No	No	Tobacco	alcohol	No	no	no	0	not apply	not apply	not apply	not apply	not apply	not apply	not apply	not apply	not apply	not apply	not apply	not apply
RHZ	2007	30	>=30	Male	Pulmonary		loss follow up	No	No	No	No	no	No	no	no	0	not apply	not apply	not apply	not apply	not apply	not apply	not apply	not apply	not apply	not apply	not apply	not apply
RHZ	2009	35	>=30	Male	Pulmonary	Negative	Cure	No	No	No	No	no	No	no	no	0	not apply	not apply	not apply	not apply	not apply	not apply	not apply	not apply	not apply	not apply	not apply	not apply
RHZ	2007	48	>=30	Male	Pulmonary	Negative	Cure	No	No	No	No	no	No	no	no	0	not apply	not apply	not apply	not apply	not apply	not apply	not apply	not apply	not apply	not apply	not apply	not apply
RHZ	2008	52	>=30	Male	Pulmonary	Negative	Cure	No	No	No	Tobacco	no	No	no	no	0	not apply	not apply	not apply	not apply	not apply	not apply	not apply	not apply	not apply	not apply	not apply	not apply
RHZ	2008	59	>=30	Male	Pulmonary	Negative	Cure	No	No	No	No	no	No	no	no	0	not apply	not apply	not apply	not apply	not apply	not apply	not apply	not apply	not apply	not apply	not apply	not apply
RHZ	2007	53	>=30	Male	Pulmonary	Negative	Cure	No	No	No	Tobacco	no	No	no	no	0	not apply	not apply	not apply	not apply	not apply	not apply	not apply	not apply	not apply	not apply	not apply	not apply
RHZ	2007	30	>=30	Female	Pulmonary		Cure	No	No	No	No	no	No	no	no	0	not apply	not apply	not apply	not apply	not apply	not apply	not apply	not apply	not apply	not apply	not apply	not apply
RHZ	2007	30	>=30	Female	Pulmonary	Negative	Cure	No	No	No	No	no	No	no	no	0	not apply	not apply	not apply	not apply	not apply	not apply	not apply	not apply	not apply	not apply	not apply	not apply
RHZ	2008	31	>=30	Female	Extrapulmonary		Cure	No	No	No	No	no	No	no	no	0	not apply	not apply	not apply	not apply	not apply	not apply	not apply	not apply	not apply	not apply	not apply	not apply
RHZ	2008	41	>=30	Male	Pulmonary	Negative	Cure	No	No	No	Tobacco	no	No	no	no	0	not apply	not apply	not apply	not apply	not apply	not apply	not apply	not apply	not apply	not apply	not apply	not apply
RHZ	2008	33	>=30	Male	Pulmonary	Negative	Cure	No	No	No	Tobacco	no	No	no	no	0	not apply	not apply	not apply	not apply	not apply	not apply	not apply	not apply	not apply	not apply	not apply	not apply
RHZ	2008	49	>=30	Female	Pulmonary	Negative	Cure	No	No	No	Tobacco	no	No	no	no	0	not apply	not apply	not apply	not apply	not apply	not apply	not apply	not apply	not apply	not apply	not apply	not apply
RHZ	2009	55	>=30	Male	Pulmonary		MDR	MDR	No	No	No	alcohol	No	no	no	0	not apply	not apply	not apply	not apply	not apply	not apply	not apply	not apply	not apply	not apply	not apply	not apply
RHZ	2009	51	>=30	Male	Pulmonary	Negative	Cure	No	No	No	No	alcohol	No	no	no	0	not apply	not apply	not apply	not apply	not apply	not apply	not apply	not apply	not apply	not apply	not apply	not apply
RHZ	2009	34	>=30	Male	Pulmonary	Negative	Cure	No	No	No	No	no	No	no	no	0	not apply	not apply	not apply	not apply	not apply	not apply	not apply	not apply	not apply	not apply	not apply	not apply
RHZ	2009	44	>=30	Male	Pulmonary	Negative	Cure	No	Diabetes	No	No	no	No	no	no	0	not apply	not apply	not apply	not apply	not apply	not apply	not apply	not apply	not apply	not apply	not apply	not apply
RHZ	2007	37	>=30	Female	Pulmonary	Negative	Cure	No	No	No	No	no	No	no	no	0	not apply	not apply	not apply	not apply	not apply	not apply	not apply	not apply	not apply	not apply	not apply	not apply
RHZ	2007	37	>=30	Female	Pulmonary	Negative	Cure	No	No	No	No	no	No	no	no	0	not apply	not apply	not apply	not apply	not apply	not apply	not apply	not apply	not apply	not apply	not apply	not apply
RHZ	2007	51	>=30	Female	Pulmonary	Negative	Cure	No	Diabetes	No	No	no	No	no	no	0	not apply	not apply	not apply	not apply	not apply	not apply	not apply	not apply	not apply	not apply	not apply	not apply
RHZ	2009	55	>=30	Female	Pulmonary	Negative	Cure	No	Diabetes	No	Tobacco	alcohol	No	no	no	0	not apply	not apply	not apply	not apply	not apply	not apply	not apply	not apply	not apply	not apply	not apply	not apply
RHZ	2007	41	>=30	Female	Pulmonary		Cure	No	No	No	No	no	No	no	no	0	not apply	not apply	not apply	not apply	not apply	not apply	not apply	not apply	not apply	not apply	not apply	not apply
RHZ	2008	54	>=30	Female	Extrapulmonary		Cure	No	No	No	No	no	No	no	no	0	not apply	not apply	not apply	not apply	not apply	not apply	not apply	not apply	not apply	not apply	not apply	not apply
RHZ	2008	62	>=30	Female	Extrapulmonary		Cure	No	No	No	No	no	No	no	no	0	not apply	not apply	not apply	not apply	not apply	not apply	not apply	not apply	not apply	not apply	not apply	not apply
RHZ	2008	43	>=30	Female	Pulmonary	Negative	Cure	No	No	No	No	no	No	no	no	0	not apply	not apply	not apply	not apply	not apply	not apply	not apply	not apply	not apply	not apply	not apply	not apply
RHZ	2009	41	>=30	Female	Extrapulmonary		Cure	No	No	No	No	no	No	no	no	0	not apply	not apply	not apply	not apply	not apply	not apply	not apply	not apply	not apply	not apply	not apply	not apply
RHZ	2008	48	>=30	Female	Pulmonary	Negative	Cure	No	No	No	No	no	No	no	no	0	not apply	not apply	not apply	not apply	not apply	not apply	not apply	not apply	not apply	not apply	not apply	not apply
RHZ	2009	51	>=30	Female	Pulmonary	Negative	Cure	No	Diabetes	No	Tobacco	no	No	no	no	0	not apply	not apply	not apply	not apply	not apply	not apply	not apply	not apply	not apply	not apply	not apply	not apply
RHZ	2007	44	>=30	Female	Pulmonary	Negative	Cure	No	No	No	No	no	No	no	no	0	not apply	not apply	not apply	not apply	not apply	not apply	not apply	not apply	not apply	not apply	not apply	not apply
RHZ	2009	61	>=30	Female	Pulmonary	Negative	Cure	No	Diabetes	No	Tobacco	no	No	no	no	0	not apply	not apply	not apply	not apply	not apply	not apply	not apply	not apply	not apply	not apply	not apply	not apply
RHZ	2009	32	>=30	Male	Pulmonary		Cure	No	No	No	No	no	No	no	no	0	not apply	not apply	not apply	not apply	not apply	not apply	not apply	not apply	not apply	not apply	not apply	not apply
RHZ	2007	64	>=30	Male	Pulmonary	Negative	Cure	No	No	No	No	no	No	no	no	0	not apply	not apply	not apply	not apply	not apply	not apply	not apply	not apply	not apply	not apply	not apply	not apply
RHZ	2008	43	>=30	Male	Pulmonary		Cure	No	No	No	No	no	No	no	no	0	not apply	not apply	not apply	not apply	not apply	not apply	not apply	not apply	not apply	not apply	not apply	not apply
RHZ	2008	63	>=30	Female	Pulmonary	Negative	Cure	No	No	No	No	no	No	no	no	0	not apply	not apply	not apply	not apply	not apply	not apply	not apply	not apply	not apply	not apply	not apply	not apply
RHZ	2009	31	>=30	Female	Pulmonary	Negative	Cure	No	No	No	No	no	No	no	no	0	not apply	not apply	not apply	not apply	not apply	not apply	not apply	not apply	not apply	not apply	not apply	not apply
RHZ	2009	59	>=30	Male	Pulmonary	Negative	Cure	No	No	No	Tobacco	alcohol	No	no	no	0	not apply	not apply	not apply	not apply	not apply	not apply	not apply	not apply	not apply	not apply	not apply	not apply
RHZ	2008	38	>=30	Female	Pulmonary	Negative	Cure	No	No	No	No	no	No	no	no	0	not apply	not apply	not apply	not apply	not apply	not apply	not apply	not apply	not apply	not apply	not apply	not apply
RHZ	2009	30	>=30	Male	Pulmonary		Cure	No	No	No	No	alcohol	No	no	no	0	not apply	not apply	not apply	not apply	not apply	not apply	not apply	not apply	not apply	not apply	not apply	not apply
RHZ	2008	49	>=30	Female	Pulmonary	Negative	Cure	No	No	No	No	no	No	no	no	0	not apply	not apply	not apply	not apply	not apply	not apply	not apply	not apply	not apply	not apply	not apply	not apply
RHZ	2009	55	>=30	Male	Pulmonary	+	Cure	No	No	No	Tobacco	no	No	no	no	0	not apply	not apply	not apply	not apply	not apply	not apply	not apply	not apply	not apply	not apply	not apply	not apply
RHZ	2008	31	>=30	Female	Pulmonary		MDR	MDR	No	No	No	no	No	no	no	0	not apply	not apply	not apply	not apply	not apply	not apply	not apply	not apply	not apply	not apply	not apply	not apply
RHZ	2008	60	>=30	Female	Pulmonary	Negative	Cure	No	No	No	No	no	No	no	no	0	not apply	not apply	not apply	not apply	not apply	not apply	not apply	not apply	not apply	not apply	not apply	not apply
RHZ	2009	60	>=30	Female	Pulmonary		Cure	No	No	No	Tobacco	no	No	no	no	0	not apply	not apply	not apply	not apply	not apply	not apply	not apply	not apply	not apply	not apply	not apply	not apply
RHZ	2009	56	>=30	Male	Pulmonary	Negative	Cure	No	No	No	Tobacco	no	No	no	no	0	not apply	not apply	not apply	not apply	not apply	not apply	not apply	not apply	not apply	not apply	not apply	not apply
RHZ	2008	42	>=30	Male	Pulmonary	Negative	Cure	No	No	No	No	no	No	no	no	0	not apply	not apply	not apply	not apply	not apply	not apply	not apply	not apply	not apply	not apply	not apply	not apply
RHZ	2008	40	>=30	Male	Pulmonary		Cure	No	No	No	No	no	No	no	no	0	not apply	not apply	not apply	not apply	not apply	not apply	not apply	not apply	not apply	not apply	not apply	not apply
RHZ	2008	41	>=30	Female	Pulmonary	Negative	Cure	No	No	No	Tobacco	no	No	no	no	0	not apply	not apply	not apply	not apply	not apply	not apply	not apply	not apply	not apply	not apply	not apply	not apply
RHZ	2008	63	>=30	Female	Pulmonary	++	Cure	No	No	No	No	no	No	no	no	0	not apply	not apply	not apply	not apply	not apply	not apply	not apply	not apply	not apply	not apply	not apply	not apply
RHZ	2009	45	>=30	Male	Pulmonary	Negative	Cure	No	No	No	Tobacco	no	No	no	no	0	not apply	not apply	not apply	not apply	not apply	not apply	not apply	not apply	not apply	not apply	not apply	not apply
RHZ	2007	45	>=30	Male	Pulmonary	Negative	MDR	MDR	Diabetes	No	No	no	No	no	no	0	not apply	not apply	not apply	not apply	not apply	not apply	not apply	not apply	not apply	not apply	not apply	not apply
RHZ	2008	49	>=30	Male	Pulmonary		Cure	No	No	No	No	no	No	no	no	0	not apply	not apply	not apply	not apply	not apply	not apply	not apply	not apply	not apply	not apply	not apply	not apply
RHZ	2009	55	>=30	Male	Pulmonary	Negative	Cure	No	No	No	No	alcohol	No	no	no	0	not apply	not apply	not apply	not apply	not apply	not apply	not apply	not apply	not apply	not apply	not apply	not apply
RHZ	2007	49	>=30	Female	Pulmonary		Cure	No	No	No	No	no	No	no	no	0	not apply	not apply	not apply	not apply	not apply	not apply	not apply	not apply	not apply	not apply	not apply	not apply
RHZ	2008	53	>=30	Male	Pulmonary	Negative	Cure	No	No	No	Tobacco	no	No	no	no	0	not apply	not apply	not apply	not apply	not apply	not apply	not apply	not apply	not apply	not apply	not apply	not apply
RHZ	2007	63	>=30	Male	Pulmonary	Negative	Cure	No	No	No	Tobacco	no	No	no	no	0	not apply	not apply	not apply	not apply	not apply	not apply	not apply	not apply	not apply	not apply	not apply	not apply
RHZ	2009	31	>=30	Female	Pulmonary	Negative	Cure	No	No	No	Tobacco	no	No	no	no	0	not apply	not apply	not apply	not apply	not apply	not apply	not apply	not apply	not apply	not apply	not apply	not apply
RHZ	2008	41	>=30	Female	Pulmonary	Negative	Cure	No	No	No	No	no	No	no	no	0	not apply	not apply	not apply	not apply	not apply	not apply	not apply	not apply	not apply	not apply	not apply	not apply
RHZ	2009	31	>=30	Male	Pulmonary	Negative	Cure	No	No	No	No	no	No	no	no	0	not apply	not apply	not apply	not apply	not apply	not apply	not apply	not apply	not apply	not apply	not apply	not apply
RHZ	2009	40	>=30	Female	Pulmonary		Cure	No	No	No	No	no	No	no	no	0	not apply	not apply	not apply	not apply	not apply	not apply	not apply	not apply	not apply	not apply	not apply	not apply
RHZ	2009	30	>=30	Female	Pulmonary	Negative	Cure	No	No	No	No	no	No	no	no	0	not apply	not apply	not apply	not apply	not apply	not apply	not apply	not apply	not apply	not apply	not apply	not apply
RHZ	2008	33	>=30	Female	Pulmonary	Negative	Cure	No	No	No	No	no	No	no	no	0	not apply	not apply	not apply	not apply	not apply	not apply	not apply	not apply	not apply	not apply	not apply	not apply
RHZ	2008	49	>=30	Female	Pulmonary	Negative	Cure	No	No	No	No	no	No	no	no	0	not apply	not apply	not apply	not apply	not apply	not apply	not apply	not apply	not apply	not apply	not apply	not apply
RHZ	2007	49	>=30	Male	Pulmonary		MDR	MDR	Diabetes	No	No	no	No	no	no	0	not apply	not apply	not apply	not apply	not apply	not apply	not apply	not apply	not apply	not apply	not apply	not apply
RHZ	2008	31	>=30	Male	Pulmonary	Negative	Cure	No	No	No	Tobacco	no	No	no	no	0	not apply	not apply	not apply	not apply	not apply	not apply	not apply	not apply	not apply	not apply	not apply	not apply
RHZ	2009	35	>=30	Male	Pulmonary		Cure	No	No	No	No	no	No	no	no	0	not apply	not apply	not apply	not apply	not apply	not apply	not apply	not apply	not apply	not apply	not apply	not apply
RHZ	2008	37	>=30	Male	Pulmonary	Negative	Cure	No	No	No	No	no	No	no	no	0	not apply	not apply	not apply	not apply	not apply	not apply	not apply	not apply	not apply	not apply	not apply	not apply
RHZ	2008	37	>=30	Male	Pulmonary	Negative	Cure	No	No	No	No	no	No	no	no	0	not apply	not apply	not apply	not apply	not apply	not apply	not apply	not apply	not apply	not apply	not apply	not apply
RHZ	2008	54	>=30	Male	Pulmonary	Negative	Cure	No	Diabetes	No	No	no	No	no	no	0	not apply	not apply	not apply	not apply	not apply	not apply	not apply	not apply	not apply	not apply	not apply	not apply
RHZ	2008	60	>=30	Male	Pulmonary		Cure	No	No	No	No	no	No	no	no	0	not apply	not apply	not apply	not apply	not apply	not apply	not apply	not apply	not apply	not apply	not apply	not apply
RHZ	2009	47	>=30	Female	Pulmonary	Negative	Cure	No	No	No	Tobacco	alcohol	yes	no	no	0	not apply	not apply	not apply	not apply	not apply	not apply	not apply	not apply	not apply	not apply	not apply	not apply
RHZ	2009	43	>=30	Female	Pulmonary	Negative	Cure	No	No	No	Tobacco	alcohol	No	no	no	0	not apply	not apply	not apply	not apply	not apply	not apply	not apply	not apply	not apply	not apply	not apply	not apply
RHZ	2009	43	>=30	Female	Pulmonary	Negative	Cure	No	No	No	No	alcohol	No	no	no	0	not apply	not apply	not apply	not apply	not apply	not apply	not apply	not apply	not apply	not apply	not apply	not apply
RHZ	2009	46	>=30	Male	Pulmonary	Negative	Cure	No	No	No	No	no	No	no	no	0	not apply	not apply	not apply	not apply	not apply	not apply	not apply	not apply	not apply	not apply	not apply	not apply
RHZ	2007	55	>=30	Male	Pulmonary		Cure	No	No	No	No	no	No	no	no	0	not apply	not apply	not apply	not apply	not apply	not apply	not apply	not apply	not apply	not apply	not apply	not apply
RHZ	2007	43	>=30	Male	Pulmonary	Negative	Cure	No	No	No	No	no	No	no	no	0	not apply	not apply	not apply	not apply	not apply	not apply	not apply	not apply	not apply	not apply	not apply	not apply
RHZ	2009	47	>=30	Male	Pulmonary	+++	Failure	No	No	No	Tobacco	alcohol	No	no	no	0	not apply	not apply	not apply	not apply	not apply	not apply	not apply	not apply	not apply	not apply	not apply	not apply
RHZ	2007	33	>=30	Female	Pulmonary		Cure	No	No	No	No	no	No	no	no	0	not apply	not apply	not apply	not apply	not apply	not apply	not apply	not apply	not apply	not apply	not apply	not apply
RHZ	2008	33	>=30	Female	Pulmonary	Negative	Cure	No	No	No	No	no	No	no	no	0	not apply	not apply	not apply	not apply	not apply	not apply	not apply	not apply	not apply	not apply	not apply	not apply
RHZ	2008	34	>=30	Female	Pulmonary	Negative	Cure	No	No	No	No	no	No	no	no	0	not apply	not apply	not apply	not apply	not apply	not apply	not apply	not apply	not apply	not apply	not apply	not apply
RHZ	2009	36	>=30	Female	Pulmonary		Cure	No	No	No	No	no	No	no	no	0	not apply	not apply	not apply	not apply	not apply	not apply	not apply	not apply	not apply	not apply	not apply	not apply
RHZ	2008	48	>=30	Female	Pulmonary	++	Cure	No	No	No	Tobacco	no	No	no	no	0	not apply	not apply	not apply	not apply	not apply	not apply	not apply	not apply	not apply	not apply	not apply	not apply
RHZ	2008	36	>=30	Female	Pulmonary	Negative	Cure	No	No	No	No	no	No	no	no	0	not apply	not apply	not apply	not apply	not apply	not apply	not apply	not apply	not apply	not apply	not apply	not apply
RHZ	2009	42	>=30	Female	Pulmonary		Cure	No	No	No	No	no	No	no	no	0	not apply	not apply	not apply	not apply	not apply	not apply	not apply	not apply	not apply	not apply	not apply	not apply
RHZ	2009	33	>=30	Male	Pulmonary	Negative	Cure	No	No	No	No	no	No	no	no	0	not apply	not apply	not apply	not apply	not apply	not apply	not apply	not apply	not apply	not apply	not apply	not apply
RHZ	2008	31	>=30	Male	Pulmonary		loss follow up	No	No	No	No	no	No	no	no	0	not apply	not apply	not apply	not apply	not apply	not apply	not apply	not apply	not apply	not apply	not apply	not apply
RHZ	2008	44	>=30	Female	Extrapulmonary		Cure	No	No	No	No	no	No	no	no	0	not apply	not apply	not apply	not apply	not apply	not apply	not apply	not apply	not apply	not apply	not apply	not apply
RHZ	2008	59	>=30	Male	Pulmonary	Negative	Cure	No	No	No	No	no	No	no	no	0	not apply	not apply	not apply	not apply	not apply	not apply	not apply	not apply	not apply	not apply	not apply	not apply
RHZ	2008	54	>=30	Female	Pulmonary		Failure	No	No	No	No	no	No	no	no	0	not apply	not apply	not apply	not apply	not apply	not apply	not apply	not apply	not apply	not apply	not apply	not apply
RHZ	2008	32	>=30	Female	Pulmonary _ Pleural		Cure	No	No	No	No	no	No	no	no	0	not apply	not apply	not apply	not apply	not apply	not apply	not apply	not apply	not apply	not apply	not apply	not apply
RHZ	2009	54	>=30	Female	Pulmonary	Negative	Cure	No	No	No	No	no	No	no	no	0	not apply	not apply	not apply	not apply	not apply	not apply	not apply	not apply	not apply	not apply	not apply	not apply
RHZ	2009	54	>=30	Female	Pulmonary	Negative	Cure	No	No	No	No	no	No	no	no	0	not apply	not apply	not apply	not apply	not apply	not apply	not apply	not apply	not apply	not apply	not apply	not apply
RHZ	2008	31	>=30	Female	Pulmonary	Negative	Cure	No	No	No	No	no	No	no	no	0	not apply	not apply	not apply	not apply	not apply	not apply	not apply	not apply	not apply	not apply	not apply	not apply
RHZ	2008	32	>=30	Male	Pulmonary	Negative	Cure	No	No	No	No	no	No	no	no	0	not apply	not apply	not apply	not apply	not apply	not apply	not apply	not apply	not apply	not apply	not apply	not apply
RHZ	2009	51	>=30	Female	Pulmonary	+++	MDR	MDR	No	No	No	no	No	no	no	0	not apply	not apply	not apply	not apply	not apply	not apply	not apply	not apply	not apply	not apply	not apply	not apply
RHZ	2009	39	>=30	Female	Pulmonary	Negative	Cure	No	No	No	No	no	No	no	no	0	not apply	not apply	not apply	not apply	not apply	not apply	not apply	not apply	not apply	not apply	not apply	not apply
